# Supplementary material for: A FeCl3-catalyzed highly regioselective 1,2-addition/substitution sequence for the construction of coumarin-substituted bis(indolyl)methanes
Source: Royal Society of Chemistry journal article supplement (doi:10.1039/c6ob00515b), 2016-01-01

## Supporting Information for

# A FeCl<sub>3</sub>-catalyzed Highly Regioselective 1,2- Addition/Substitution Sequence for the Construction of Coumarin-substituted Bis(indolyl)methanes

Wen-Bo Wang, Yan-Shuo Zhu, Sheng-Qiang Guo, Qi-Lin Wang \*, Zhan-Wei Bu \*

Institute of Environmental and Analytical Sciences, College of Chemistry and Chemical  
Engineering, Henan University, Kaifeng 475004, China

*E-mail: wangqilin@henu.edu.cn ; buzhanwei@henu.edu.cn.*

### Table of Contents

|                                                                      |     |
|----------------------------------------------------------------------|-----|
| 1. General methods.....                                              | S2  |
| 2. Experimental data for bis(indolyl)methanes <b>3</b> .....         | S2  |
| 3. Crystal data for <b>3a</b> .....                                  | S10 |
| 4. Copies of <sup>1</sup> H NMR and <sup>13</sup> C NMR spectra..... | S20 |

## 1. General methods

NMR spectra were recorded with tetramethylsilane as the internal standard.  $^1\text{H}$  NMR spectra were recorded at 300 MHz, and  $^{13}\text{C}$  NMR spectra were recorded at 75 MHz (Bruker Avance).  $^1\text{H}$  NMR chemical shifts ( $\delta$ ) are reported in ppm relative to tetramethylsilane (TMS) with the solvent signal as the internal standard ( $\text{CDCl}_3$  at 7.26 ppm,  $(\text{CD}_3)_2\text{SO}$  at 2.50 ppm).  $^{13}\text{C}$  NMR chemical shifts are reported in ppm from tetramethylsilane (TMS) with the solvent resonance as the internal standard ( $\text{CDCl}_3$  at 77.00 ppm,  $(\text{CD}_3)_2\text{SO}$  at 39.52 ppm). Data are given as: s (singlet), d (doublet), t (triplet), q (quartet), dd (double of doublet), br (broad) or m (multiplets), coupling constants (Hz) and integration. Flash column chromatography was carried out using silica gel eluting with ethyl acetate and petroleum ether. High resolution mass spectra were obtained with the Q-TOF-Premier mass spectrometer. Reactions were monitored by TLC and visualized with ultraviolet light. IR spectra were recorded on a ThermoFisherNicolet Avatar 360 FTIR spectrometer on a KBr beamsplitter.

## 2. Experimental data for bis(indolyl)methanes **3**

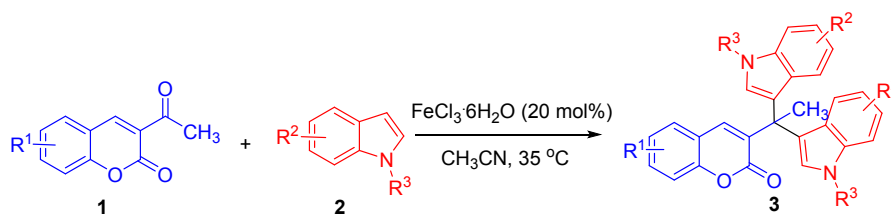

**General procedure:** To a 5.0 mL vial were successively added 3-acylcoumarin **1** (0.12 mmol), indole **2** (0.30 mmol),  $\text{FeCl}_3 \cdot 6\text{H}_2\text{O}$  (6.5 mg, 0.024 mmol) and 1.0 mL  $\text{CH}_3\text{CN}$ . The resulting mixture was stirred for 10-72 h at  $35\text{ }^\circ\text{C}$  till almost full consumption of **1** by TLC analysis, and then the reaction mixture was directly subjected to flash column chromatography on silica gel (petroleum ether/ ethyl acetate) to afford the corresponding products **3**.

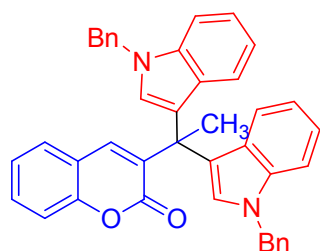

### 3-(1,1-bis(1-benzyl-1H-indol-3-yl)ethyl)-2H-chromen-2-one (3a)

Product **3a** was obtained in 98% yield as a white solid. Reaction time = 12 h; m. p. 234.1-235.1 °C; <sup>1</sup>H NMR (400 MHz, CDCl<sub>3</sub>), δ 7.64 (s, 1H), 7.31 (d, *J* = 8.0 Hz, 3H), 7.19-7.13 (m, 11H), 7.02-6.97 (m, 6H), 6.88 (s, 2H), 6.84 (t, *J* = 4.0 Hz, 2H), 5.18 (s, 4H), 2.39 (s, 3H); <sup>13</sup>C NMR (100 MHz, CDCl<sub>3</sub>) δ 158.7, 152.6, 152.5, 139.5, 136.6, 136.3, 127.7, 127.2, 127.1, 126.4, 125.7, 125.4, 122.8, 120.7, 120.2, 118.9, 117.9, 114.9, 109.1, 48.9, 42.4, 24.9. IR (KBr) ν 3437, 3121, 3054, 2916, 1727, 1610, 1457, 1178, 1094, 740, 705 cm<sup>-1</sup>. HRMS (ESI) Calcd. for C<sub>41</sub>H<sub>32</sub>N<sub>2</sub>NaO<sub>2</sub> [M+Na]<sup>+</sup>: 607.2356, Found: 607.2338.

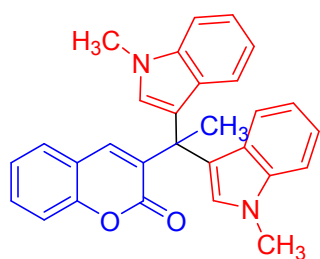

### 3-(1,1-bis(1-methyl-1H-indol-3-yl)ethyl)-2H-chromen-2-one (3b)

Product **3b** was obtained in 98% yield as a yellow solid. Reaction time = 10 h; m. p. 230.2-231.5 °C; <sup>1</sup>H NMR (400 MHz, CDCl<sub>3</sub>), δ 7.65 (s, 1H), 7.31 (t, *J* = 8.0 Hz, 3H), 7.24 (d, *J* = 8.0 Hz, 2H), 7.17 (d, *J* = 8.0 Hz, 2H), 7.12-7.04 (m, 3H), 6.87 (t, *J* = 8.0 Hz, 2H), 6.70 (s, 2H), 3.64 (s, 6H), 2.35 (s, 3H); <sup>13</sup>C NMR (100 MHz, CDCl<sub>3</sub>) δ 158.9, 152.7, 139.6, 136.8, 132.0, 129.7, 127.7, 127.1, 125.5, 122.9, 120.7, 120.1, 118.5, 118.3, 117.8, 115.0, 108.6, 42.5, 31.9, 25.1. IR (KBr) ν 3428, 3116, 3053, 2926, 1728, 1609, 1460, 1170, 1097, 737 cm<sup>-1</sup>. HRMS (ESI) Calcd. for C<sub>29</sub>H<sub>24</sub>N<sub>2</sub>NaO<sub>2</sub> [M+Na]<sup>+</sup>: 455.1730, Found: 455.1728

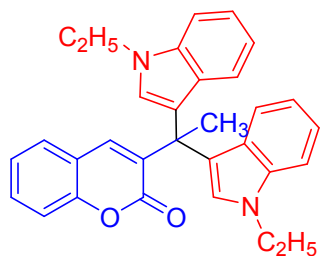

### 3-(1,1-bis(1-ethyl-1H-indol-3-yl)ethyl)-2H-chromen-2-one (3c)

Product **3c** was obtained in 98% yield as a yellow solid. Reaction time = 10 h; m. p. 243.8-244.1 °C; <sup>1</sup>H NMR (400 MHz, CDCl<sub>3</sub>), δ 7.65 (s, 1H), 7.31-7.26 (m, 5H), 7.17-7.14 (m, 2H), 7.09-7.04

(m, 3H), 6.86-6.82 (m, 2H), 6.78 (s, 2H), 4.02 (q,  $J = 8.0$  Hz, 4H), 2.35 (s, 3H), 1.32 (t,  $J = 8.0$  Hz, 6H);  $^{13}\text{C}$  NMR (100 MHz,  $\text{CDCl}_3$ )  $\delta$  158.7, 152.5, 139.4, 135.7, 131.8, 129.5, 127.0, 126.1, 125.6, 122.7, 120.7, 119.8, 118.3, 117.5, 114.9, 108.5, 108.4, 42.4, 39.9, 25.0, 14.5. IR (KBr)  $\nu$  3435, 3052, 2979, 2937, 1730, 1612, 1459, 1202, 978, 746  $\text{cm}^{-1}$ . HRMS (ESI) Calcd. for  $\text{C}_{31}\text{H}_{28}\text{N}_2\text{NaO}_2$   $[\text{M}+\text{Na}]^+$ : 483.2043, Found: 483.2050.

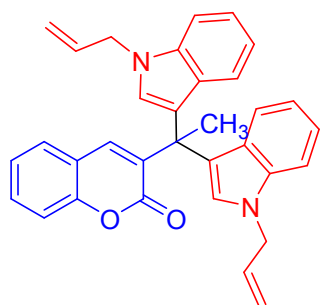

### 3-(1,1-bis(1-allyl-1H-indol-3-yl)ethyl)-2H-chromen-2-one (3d)

Product **3d** was obtained in 61% yield as a white solid. Reaction time = 31 h; m. p. 176.3-178.3  $^{\circ}\text{C}$ ;  $^1\text{H}$  NMR (400 MHz,  $\text{CDCl}_3$ ),  $\delta$  7.65 (s, 1H), 7.35-7.29 (m, 3H), 7.24 (d,  $J = 8.0$  Hz, 2H), 7.19-7.17 (m, 2H), 7.09-7.04 (m, 3H), 6.87-6.84 (m, 2H), 6.77 (s, 2H), 5.93-5.83 (m, 2H), 5.07 (d,  $J = 12.0$  Hz, 2H), 4.95 (d,  $J = 16.0$  Hz, 2H), 4.60-4.59 (m, 4H), 2.36 (s, 3H);  $^{13}\text{C}$  NMR (100 MHz,  $\text{CDCl}_3$ )  $\delta$  158.6, 152.6, 139.5, 136.1, 132.5, 131.8, 129.6, 127.0, 126.8, 125.6, 122.7, 120.7, 120.0, 118.6, 118.2, 117.8, 115.9, 114.9, 108.9, 47.7, 42.4, 24.9. IR (KBr)  $\nu$  34336, 3049, 2982, 1732, 1610, 1463, 1188, 984, 742  $\text{cm}^{-1}$ . HRMS (ESI) Calcd. for  $\text{C}_{33}\text{H}_{28}\text{N}_2\text{NaO}_2$   $[\text{M}+\text{Na}]^+$ : 507.2043, Found: 507.2020.

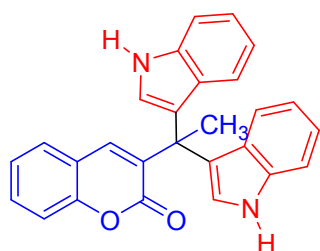

### 3-(1,1-di(1H-indol-3-yl)ethyl)-2H-chromen-2-one (3e)

Product **3e** was obtained in 94% yield as a white solid. Reaction time = 72 h; m. p. 277.3-278.1  $^{\circ}\text{C}$ ;  $^1\text{H}$  NMR (400 MHz,  $\text{DMSO}-d_6$ ),  $\delta$  10.91 (s, 2H), 7.63 (s, 1H), 7.53-7.49 (s, 1H), 7.38 (t,  $J = 4$  Hz, 3H), 7.34 (d,  $J = 8$  Hz, 1H), 7.28 (d,  $J = 8$  Hz, 2H), 7.20 (t,  $J = 8$  Hz, 1H), 7.02 (t,  $J = 8$  Hz, 2H), 6.88 (d,  $J = 1$  Hz, 2H), 6.81 (t,  $J = 8$  Hz, 2H), 2.33 (s, 3H);  $^{13}\text{C}$  NMR (100 MHz,  $\text{DMSO}-d_6$ ) 159.3, 153.5, 140.6, 137.5, 133.4, 131.5, 128.9, 126.1, 124.7, 124.6, 121.1, 121.0, 120.1, 119.2, 118.8,

115.9, 112.3, 43.4, 26.2. IR (KBr)  $\nu$  3408, 2923, 1709, 1611, 1455, 1421, 1110, 986, 742  $\text{cm}^{-1}$ .

HRMS (ESI) Calcd. for  $\text{C}_{27}\text{H}_{20}\text{N}_2\text{NaO}_2$   $[\text{M}+\text{Na}]^+$ : 427.1417, Found: 427.1419.

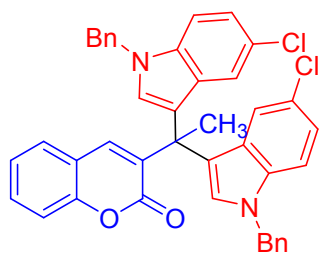

### 3-(1,1-bis(1-benzyl-5-chloro-1H-indol-3-yl)ethyl)-2H-chromen-2-one (3f)

Product **3f** was obtained in 99% yield as a white solid. Reaction time = 67 h; m.p. 146.6-148.6  $^{\circ}\text{C}$ ;

$^1\text{H}$  NMR (400 MHz,  $\text{CDCl}_3$ ),  $\delta$  7.57 (s, 1H), 7.28 (t,  $J = 8$  Hz, 1H), 7.30-7.23 (m, 10H), 7.16-7.12 (m, 3H), 7.07-7.00 (m, 8H), 5.26 (s, 4H), 2.42 (s, 3H);  $^{13}\text{C}$  NMR (100 MHz,  $\text{CDCl}_3$ )  $\delta$  159.8, 153.6, 140.7, 137.1, 135.7, 132.6, 131.1, 129.3, 129.0, 128.3, 127.7, 126.4, 124.9, 124.1, 121.9, 120.7, 119.2, 119.1, 116.1, 111.3, 50.4, 43.3, 26.0 (one carbon missing). IR (KBr)  $\nu$  3431, 3030, 2926, 1727, 1610, 1470, 1178, 980, 793, 755  $\text{cm}^{-1}$ . HRMS (ESI) Calcd. for  $\text{C}_{41}\text{H}_{30}\text{Cl}_2\text{N}_2\text{NaO}_2$   $[\text{M}+\text{Na}]^+$ : 675.2140, Found: 675.2136.

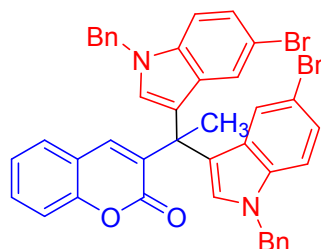

### 3-(1,1-bis(1-benzyl-5-bromo-1H-indol-3-yl)ethyl)-2H-chromen-2-one (3g)

Product **3g** was obtained in 99% yield as a yellow solid. Reaction time = 72 h; m. p. 152.2-153.9

$^{\circ}\text{C}$ ;  $^1\text{H}$  NMR (400 MHz,  $\text{CDCl}_3$ ),  $\delta$  7.49 (s, 1H), 7.39-7.33 (m, 3H), 7.24-7.13 (m, 8H), 7.09-7.06 (m, 3H), 7.02-6.96 (m, 6H), 6.89 (s, 2H), 5.16 (s, 4H), 2.34 (s, 3H);  $^{13}\text{C}$  NMR (100 MHz,  $\text{CDCl}_3$ )  $\delta$  158.7, 152.5, 139.6, 135.9, 134.8, 131.4, 130.0, 128.1, 127.9, 127.3, 127.2, 126.6, 125.4, 123.3, 123.1, 122.7, 118.0, 117.9, 115.0, 111.5, 110.7, 49.3, 42.1, 24.9. IR (KBr)  $\nu$  3432, 3029, 2928, 1725, 1610, 1461, 1358, 1179, 982, 795, 729  $\text{cm}^{-1}$ . HRMS (ESI) Calcd. for  $\text{C}_{41}\text{H}_{30}\text{Br}_2\text{N}_2\text{NaO}_2$   $[\text{M}+\text{Na}]^+$ : 763.0566, Found: 763.0574.

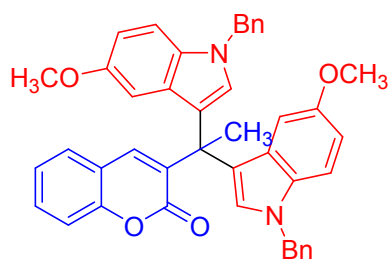

### 3-(1,1-bis(1-benzyl-5-methoxy-1H-indol-3-yl)ethyl)-2H-chromen-2-one (3h)

Product **3h** was obtained in 56% yield as a white solid. Reaction time = 50 h; m. p. 89.2-91.2 °C; <sup>1</sup>H NMR (400 MHz, CDCl<sub>3</sub>), δ 7.65 (s, 1H), 7.36-7.31 (m, 1H), 7.21-7.13 (m, 8H), 7.08-7.03 (m, 3H), 6.98 (d, *J* = 8 Hz, 4H), 6.88 (s, 2H), 6.74 (d, *J* = 4 Hz, 2H), 6.67 (dd, *J*<sub>1</sub> = *J*<sub>2</sub> = 4 Hz, 2H), 5.15 (s, 4H), 3.46 (s, 6H), 2.37 (s, 3H); <sup>13</sup>C NMR (100 MHz, CDCl<sub>3</sub>) δ 158.7, 152.6, 152.3, 139.4, 136.7, 131.6, 131.5, 129.7, 127.9, 127.7, 126.8, 126.4, 126.1, 125.4, 122.9, 118.2, 118.1, 114.9, 110.1, 109.8, 102.8, 54.6, 49.2, 42.3, 24.6. IR (KBr) ν 3441, 2937, 2832, 1727, 1613, 1486, 1447, 1222, 1176, 1110, 1032, 797, 733 cm<sup>-1</sup>. HRMS (ESI) Calcd. for C<sub>43</sub>H<sub>36</sub>N<sub>2</sub>NaO<sub>4</sub> [M+Na]<sup>+</sup>: 667.2567, Found: 667.2546.

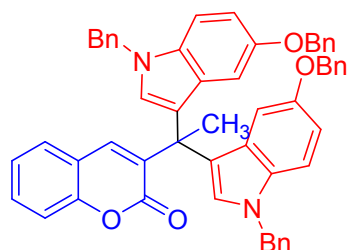

### 3-(1,1-bis(1-benzyl-5-(benzyloxy)-1H-indol-3-yl)ethyl)-2H-chromen-2-one (3i)

Product **3i** was obtained in 77% yield as a white solid. Reaction time = 10 h; m.p. 88.2-90.1 °C; <sup>1</sup>H NMR (400 MHz, CDCl<sub>3</sub>), δ 7.64 (s, 1H), 7.43 (t, *J* = 8 Hz, 1H), 7.22 (t, *J* = 8 Hz, 14H), 7.17 (t, *J* = 8 Hz, 5H), 7.12 (d, *J* = 8 Hz, 2H), 7.05 (d, *J* = 8 Hz, 4H), 6.93 (s, 2H), 6.90 (d, *J* = 4 Hz, 2H), 6.83 (dd, *J*<sub>1</sub> = *J*<sub>2</sub> = 4 Hz, 2H), 5.21 (s, 4H), 4.75 (s, 4H), 2.42 (s, 3H); <sup>13</sup>C NMR (100 MHz, CDCl<sub>3</sub>) δ 159.8, 153.7, 152.6, 140.5, 137.8, 137.5, 132.8, 132.6, 130.8, 129.0, 128.8, 128.4, 128.1, 127.1, 127.5, 127.4, 127.1, 126.5, 124.0, 119.3, 119.2, 116.0, 112.0, 110.9, 105.5, 70.1, 50.3, 43.4, 25.7. IR (KBr) ν 3433, 3031, 2922, 1728, 1613, 1484, 1451, 1206, 1116, 1024, 734, 701 cm<sup>-1</sup>. HRMS (ESI) Calcd. for C<sub>55</sub>H<sub>44</sub>N<sub>2</sub>NaO<sub>4</sub> [M+Na]<sup>+</sup>: 819.3880, Found: 819.3871.

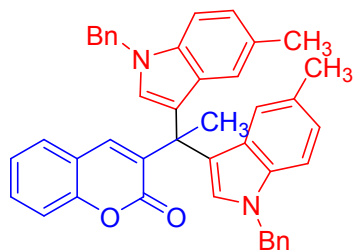

### 3-(1,1-bis(1-benzyl-5-methyl-1H-indol-3-yl)ethyl)-2H-chromen-2-one (3j)

Product **3j** was obtained in 89% yield as a white solid. Reaction time = 4 h; m.p. 126.8-128.8 °C; <sup>1</sup>H NMR (400 MHz, CDCl<sub>3</sub>), δ 7.62 (d, *J* = 4 Hz, 1H), 7.33 (t, *J* = 8 Hz, 1H), 7.20-7.12 (m, 10H), 7.08-7.03 (m, 3H), 6.98 (d, *J* = 8 Hz, 4H), 6.83 (d, *J* = 8 Hz, 4H), 5.15 (s, 4H), 2.39 (s, 3H), 2.19 (s, 6H); <sup>13</sup>C NMR (100 MHz, CDCl<sub>3</sub>) δ 158.7, 152.6, 139.5, 136.8, 134.7, 132.0, 129.5, 127.7, 127.4, 127.0, 126.9, 126.3, 126.0, 125.4, 122.7, 121.8, 120.5, 118.3, 118.2, 114.9, 108.7, 49.0, 42.5, 25.0, 20.6. IR (KBr) ν 3432, 3029, 2919, 1728, 1610, 1487, 1450, 1260, 1097, 1026, 798, 702 cm<sup>-1</sup>. HRMS (ESI) Calcd. for C<sub>43</sub>H<sub>36</sub>N<sub>2</sub>NaO<sub>2</sub> [M+Na]<sup>+</sup>: 635.3194, Found: 635.3188.

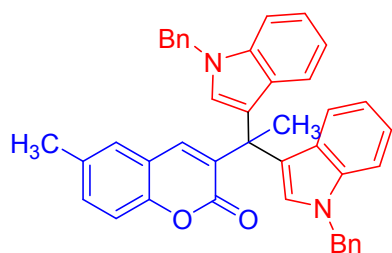

### 3-(1,1-bis(1-benzyl-1H-indol-3-yl)ethyl)-6-methyl-2H-chromen-2-one (3k)

Product **3k** was obtained in 93% yield as a white solid. Reaction time = 72 h; m. p. 234.2-234.9 °C; <sup>1</sup>H NMR (400 MHz, CDCl<sub>3</sub>), δ 7.60 (s, 1H), 7.31 (d, *J* = 8 Hz, 2H), 7.20-7.13 (m, 9H), 7.08 (d, *J* = 8 Hz, 1H), 7.00 (dd, *J*<sub>1</sub> = *J*<sub>2</sub> = 8 Hz, 7H), 6.86 (dd, *J*<sub>1</sub> = *J*<sub>2</sub> = 8 Hz, 4H), 5.20 (q, *J* = 12 Hz, 4H), 2.39 (s, 3H), 2.22 (s, 3H); <sup>13</sup>C NMR (100 MHz, CDCl<sub>3</sub>) δ 158.9, 150.7, 139.6, 136.7, 136.3, 132.4, 131.7, 130.6, 127.7, 127.2, 126.9, 126.4, 125.8, 125.5, 120.7, 120.2, 119.0, 117.9, 117.8, 114.6, 109.1, 49.0, 42.4, 24.9, 19.6. IR (KBr) ν 3433, 2964, 1727, 1261, 1096, 1023, 803, 739 cm<sup>-1</sup>. HRMS (ESI) Calcd. for C<sub>42</sub>H<sub>34</sub>N<sub>2</sub>NaO<sub>2</sub> [M+Na]<sup>+</sup>: 621.2512, Found: 621.2494.

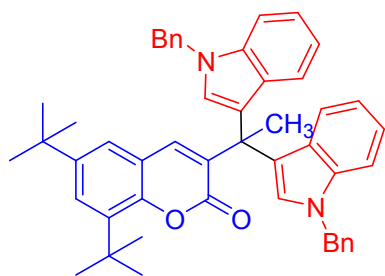

### 3-(1,1-bis(1-benzyl-1H-indol-3-yl)ethyl)-6,8-di-tert-butyl-2H-chromen-2-one (3I)

Product **3I** was obtained in 90% yield as a white solid. Reaction time = 30 h; m. p. 145.7-147.6 °C; <sup>1</sup>H NMR (400 MHz, CDCl<sub>3</sub>), δ 7.60 (s, 1H), 7.40 (d, *J* = 4 Hz, 1H), 7.35 (d, *J* = 8 Hz, 2H), 7.18-7.09 (m, 8H), 6.99 (dd, *J*<sub>1</sub> = *J*<sub>2</sub> = 8 Hz, 7H), 6.85 (dd, *J*<sub>1</sub> = 4 Hz, *J*<sub>2</sub> = 8 Hz, 4H), 5.16 (s, 4H), 2.39 (s, 3H), 1.41 (s, 9H), 1.19 (s, 9H); <sup>13</sup>C NMR (100 MHz, CDCl<sub>3</sub>) δ 159.7, 150.4, 146.1, 141.9, 137.8, 137.4, 136.5, 131.9, 128.8, 128.3, 127.5, 127.0, 126.7, 126.0, 122.8, 122.1, 121.3, 120.3, 119.2, 119.0, 110.1, 50.1, 43.4, 35.1, 34.7, 31.5, 30.1, 26.3. IR (KBr) ν 3435, 2960, 1725, 1463, 1361, 1183, 735 cm<sup>-1</sup>. HRMS (ESI) Calcd. for C<sub>49</sub>H<sub>48</sub>N<sub>2</sub>NaO<sub>2</sub> [M+Na]<sup>+</sup>: 719.3608, Found: 719.3592.

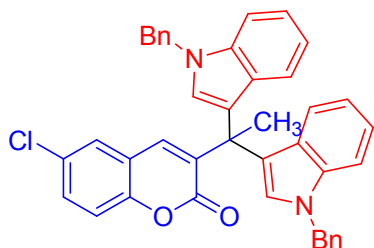

### 3-(1,1-bis(1-benzyl-1H-indol-3-yl)ethyl)-6-chloro-2H-chromen-2-one (3m)

Product **3m** was obtained in 99% yield as a yellow solid. Reaction time = 72 h; m. p. 130.5-131.7 °C; <sup>1</sup>H NMR (400 MHz, CDCl<sub>3</sub>), δ 7.58 (s, 1H), 7.25 (dd, *J*<sub>1</sub> = 8 Hz, *J*<sub>2</sub> = 4 Hz, 3H), 7.19-7.08 (m, 10H), 6.99 (dd, *J*<sub>1</sub> = *J*<sub>2</sub> = 8 Hz, 6H), 6.85 (t, *J* = 8 Hz, 4H), 5.17 (t, *J* = 16 Hz, 4H), 2.37 (s, 3H); <sup>13</sup>C NMR (100 MHz, CDCl<sub>3</sub>) δ 158.0, 150.9, 138.2, 136.5, 136.3, 133.0, 129.5, 127.9, 127.7, 127.3, 126.4, 126.2, 125.6, 125.5, 120.5, 120.3, 119.3, 118.4, 118.0, 116.3, 109.2, 49.0, 42.5, 24.8. IR (KBr) ν 3434, 2923, 1734, 1461, 1179, 983, 818, 738, 696 cm<sup>-1</sup>. HRMS (ESI) Calcd. for C<sub>41</sub>H<sub>31</sub>ClN<sub>2</sub>NaO<sub>2</sub> [M+Na]<sup>+</sup>: 641.1966, Found: 641.1970.



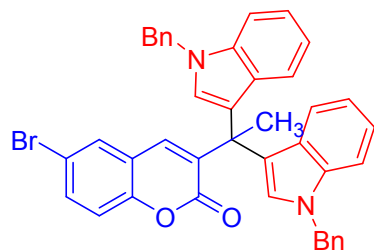

**3-(1,1-bis(1-benzyl-1H-indol-3-yl)ethyl)-6-bromo-2H-chromen-2-one (3n)**

Product **3n** was obtained in 98% yield as a yellow solid. Reaction time = 72 h; m. p. 195.6-197.6 °C; <sup>1</sup>H NMR (400 MHz, CDCl<sub>3</sub>), δ 7.58 (s, 1H), 7.38 (dd, *J*<sub>1</sub> = *J*<sub>2</sub> = 2 Hz, 1H), 7.28 (t, *J* = 8 Hz, 3H), 7.19-7.11 (m, 8H), 7.00 (ddd, *J*<sub>1</sub> = *J*<sub>2</sub> = *J*<sub>3</sub> = 8 Hz, 7H), 6.85 (t, *J* = 8 Hz, 4H), 5.17 (t, *J* = 16 Hz, 4H), 2.37 (s, 3H); <sup>13</sup>C NMR (100 MHz, CDCl<sub>3</sub>) δ 157.9, 151.4, 138.1, 136.5, 136.3, 133.0, 132.3, 129.2, 127.7, 127.3, 126.4, 125.6, 125.5, 120.5, 120.3, 119.8, 118.4, 118.0, 116.6, 115.3, 109.2, 49.0, 42.5, 24.8. IR (KBr) ν 3440, 3058, 2933, 1734, 1607, 1470, 1329, 1179, 1069, 985, 740 cm<sup>-1</sup>. HRMS (ESI) Calcd. for C<sub>41</sub>H<sub>31</sub>BrN<sub>2</sub>NaO<sub>2</sub> [M+Na]<sup>+</sup>: 685.1461, Found: 685.1468.

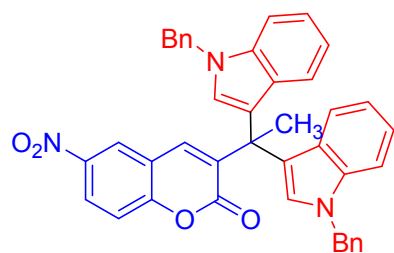

**3-(1,1-bis(1-benzyl-1H-indol-3-yl)ethyl)-6-nitro-2H-chromen-2-one (3o)**

Product **3o** was obtained in 98% yield as a yellow solid. Reaction time = 72 h; m. p. 141.0-142.6 °C; <sup>1</sup>H NMR (400 MHz, CDCl<sub>3</sub>), δ 8.25 (dd, *J*<sub>1</sub> = *J*<sub>2</sub> = 4 Hz, 1H), 8.18 (d, *J* = 4 Hz, 1H), 7.83 (s, 1H), 7.36-7.22 (m, 11H), 7.14-7.06 (m, 6H), 6.96 (dd, *J*<sub>1</sub> = 4 Hz, *J*<sub>2</sub> = 12 Hz, 4H), 5.27 (t, *J* = 20 Hz, 4H), 2.46 (s, 3H); <sup>13</sup>C NMR (100 MHz, CDCl<sub>3</sub>) δ 158.0, 157.1, 143.7, 139.1, 137.5, 137.3, 135.0, 128.7, 128.5, 127.5, 126.5, 126.4, 125.5, 123.9, 121.5, 121.4, 119.3, 119.2, 118.8, 117.0, 110.3, 50.0, 43.7, 25.6. IR (KBr) ν 3438, 3058, 1734, 1530, 1461, 1346, 1178, 966, 739 cm<sup>-1</sup>. HRMS (ESI) Calcd. for C<sub>41</sub>H<sub>31</sub>N<sub>3</sub>NaO<sub>4</sub> [M+Na]<sup>+</sup>: 652.2207, Found: 652.2189.

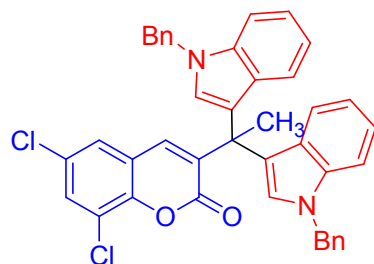

### 3-(1,1-bis(1-benzyl-1H-indol-3-yl)ethyl)-6,8-dichloro-2H-chromen-2-one (3p)

Product **3p** was obtained in 99% yield as a yellow solid. Reaction time = 41 h; m. p. 213.9-215.7 °C; <sup>1</sup>H NMR (400 MHz, CDCl<sub>3</sub>), δ 7.65 (s, 1H), 7.43 (d, *J* = 4 Hz, 1H), 7.33 (d, *J* = 8 Hz, 2H), 7.28-7.20 (m, 8H), 7.13-7.05 (m, 7H), 6.95 (dd, *J*<sub>1</sub> = 4 Hz, *J*<sub>2</sub> = 8 Hz, 4H), 5.26 (t, *J* = 16 Hz, 4H), 2.44 (s, 3H); <sup>13</sup>C NMR (100 MHz, CDCl<sub>3</sub>) δ 157.9, 148.0, 139.0, 137.6, 137.4, 134.9, 130.6, 128.8, 128.7, 128.5, 127.6, 126.6, 125.9, 121.7, 121.5, 121.4, 121.1, 119.2, 119.1, 110.4, 50.1, 43.7, 25.6 (one carbon missing). IR (KBr) ν 3436, 3062, 2933, 1734, 1458, 1181, 993, 738 cm<sup>-1</sup>. HRMS (ESI) Calcd. for C<sub>41</sub>H<sub>30</sub>Cl<sub>2</sub>N<sub>2</sub>NaO<sub>2</sub> [M+Na]<sup>+</sup>: 675.1577, Found: 675.1596.

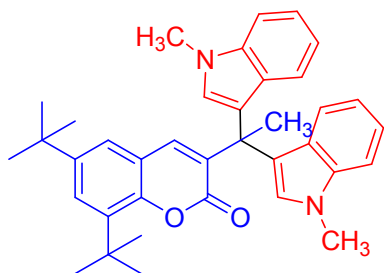

### 3-(1,1-bis(1-methyl-1H-indol-3-yl)ethyl)-6,8-di-tert-butyl-2H-chromen-2-one (3q)

Product **3q** was obtained in 90% yield as a yellow solid. Reaction time = 55 h; m. p. 323.0-324.3 °C; <sup>1</sup>H NMR (400 MHz, CDCl<sub>3</sub>), δ 7.65 (s, 1H), 7.39 (s, 1H), 7.34 (d, *J* = 8 Hz, 2H), 7.23 (d, *J* = 8 Hz, 2H), 7.10 (dd, *J*<sub>1</sub> = *J*<sub>2</sub> = 8 Hz, 2H), 6.97 (s, 1H), 6.87 (t, *J* = 8 Hz, 2H), 6.70 (s, 2H), 3.62 (s, 6 H), 2.35 (s, 3H), 1.39 (s, 9H), 1.19 (s, 9H); <sup>13</sup>C NMR (100 MHz, CDCl<sub>3</sub>) δ 158.6, 149.2, 144.9, 140.7, 136.7, 135.4, 130.6, 127.6, 125.5, 124.8, 121.6, 120.8, 119.9, 118.6, 118.1, 117.6, 108.4, 42.1, 33.9, 33.6, 31.8, 30.4, 28.9, 25.1. IR (KBr) ν 3431, 2955, 1726, 1474, 1367, 1208, 1008, 742 cm<sup>-1</sup>. HRMS (ESI) Calcd. for C<sub>37</sub>H<sub>40</sub>N<sub>2</sub>NaO<sub>2</sub> [M+Na]<sup>+</sup>: 567.2982, Found: 567.3000.

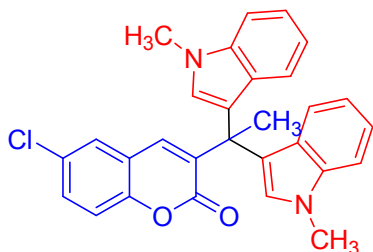

### 3-(1,1-bis(1-methyl-1H-indol-3-yl)ethyl)-6-chloro-2H-chromen-2-one (3r)

Product **3r** was obtained in 97% yield as a yellow solid. Reaction time = 48 h; m. p. 173.0-174.8 °C; <sup>1</sup>H NMR (400 MHz, CDCl<sub>3</sub>), δ 7.60 (s, 1H), 7.27-7.23 (m, 5H), 7.16-7.08 (m, 4H), 6.87 (t, *J* =

8 Hz, 2H), 6.70 (s, 2H), 3.63 (s, 6H), 2.34 (s, 3H);  $^{13}\text{C}$  NMR (100 MHz,  $\text{CDCl}_3$ )  $\delta$  158.1, 151.0, 138.3, 136.8, 133.1, 129.5, 128.0, 127.6, 126.2, 125.3, 120.4, 120.1, 119.3, 118.1, 117.8, 116.3, 108.6, 42.5, 31.8, 24.9. IR (KBr)  $\nu$  3418, 3057, 2940, 1734, 1610, 1539, 1478, 1328, 1248, 1211, 986, 910, 732  $\text{cm}^{-1}$ . HRMS (ESI) Calcd. for  $\text{C}_{29}\text{H}_{23}\text{ClN}_2\text{NaO}_2$   $[\text{M}+\text{Na}]^+$ : 489.1340, Found: 489.1332.

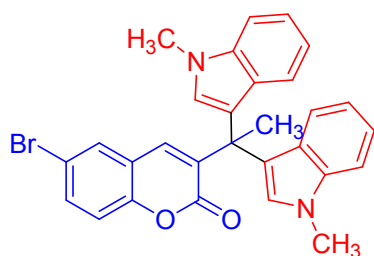

### 3-(1,1-bis(1-methyl-1H-indol-3-yl)ethyl)-6-bromo-2H-chromen-2-one (3s)

Product **3s** was obtained in 95% yield as a yellow solid. Reaction time = 48 h; m. p. 250.3-252.3  $^{\circ}\text{C}$ ;  $^1\text{H}$  NMR (400 MHz,  $\text{CDCl}_3$ ),  $\delta$  7.60 (s, 1H), 7.31-7.25 (m, 5H), 7.17 (s, 1H), 7.12 (t,  $J$  = 8 Hz, 2H), 7.05 (d,  $J$  = 8 Hz, 1H), 6.89 (t,  $J$  = 8 Hz, 2H), 6.71 (s, 2H), 3.65 (s, 6H), 2.34 (s, 3H);  $^{13}\text{C}$  NMR (100 MHz,  $\text{CDCl}_3$ )  $\delta$  158.0, 151.4, 138.2, 136.7, 133.1, 132.3, 129.2, 127.6, 125.3, 120.4, 120.1, 119.8, 118.0, 117.8, 116.7, 115.3, 108.6, 42.4, 31.8, 24.8. IR (KBr)  $\nu$  3437, 2923, 1733, 1475, 1250, 1098, 985, 906, 735  $\text{cm}^{-1}$ . HRMS (ESI) Calcd. for  $\text{C}_{29}\text{H}_{23}\text{BrN}_2\text{NaO}_2$   $[\text{M}+\text{Na}]^+$ : 533.0835, Found: 533.0821.

### 3. Crystal data for 3a

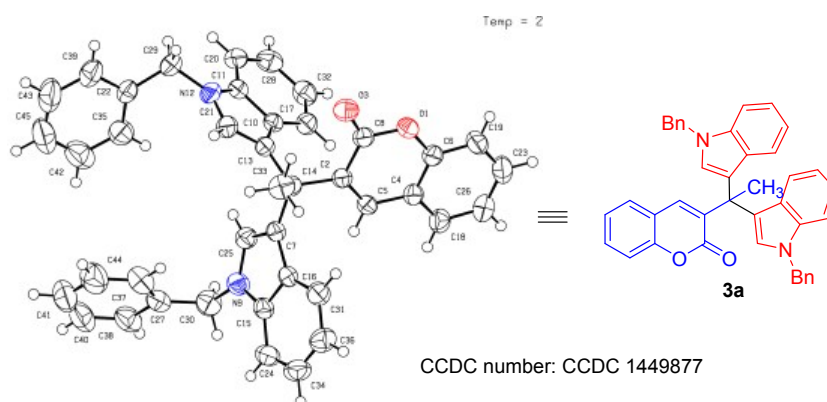

**Table S1.** Crystal data and structure refinement for **3a**.

|                     |                                                  |
|---------------------|--------------------------------------------------|
| Identification code | <b>3a</b>                                        |
| Empirical formula   | $\text{C}_{41}\text{H}_{32}\text{N}_2\text{O}_2$ |

|                                   |                                                                                                                                          |
|-----------------------------------|------------------------------------------------------------------------------------------------------------------------------------------|
| Formula weight                    | 584.69                                                                                                                                   |
| Temperature                       | 296(2) K                                                                                                                                 |
| Wavelength                        | 0.71073 Å                                                                                                                                |
| Crystal system, space group       | Triclinic, P -1                                                                                                                          |
| Unit cell dimensions              | a = 11.9786(15) Å    alpha = 76.842(2) deg.<br>b = 12.3683(16) Å    beta = 66.138(2) deg.<br>c = 12.7772(17) Å    gamma = 62.478(2) deg. |
| Volume                            | 1533.3(3) Å <sup>3</sup>                                                                                                                 |
| Z, Calculated density             | 2, 1.266 Mg/m <sup>3</sup>                                                                                                               |
| Absorption coefficient            | 0.078 mm <sup>-1</sup>                                                                                                                   |
| F(000)                            | 616                                                                                                                                      |
| Crystal size                      | 0.40 x 0.25 x 0.20 mm                                                                                                                    |
| Theta range for data collection   | 1.74 to 25.00 deg.                                                                                                                       |
| Limiting indices                  | -10 ≤ h ≤ 14, -13 ≤ k ≤ 14, -9 ≤ l ≤ 15                                                                                                  |
| Reflections collected / unique    | 7881 / 5368 [R(int) = 0.0163]                                                                                                            |
| Completeness to theta = 25.00     | 99.5 %                                                                                                                                   |
| Absorption correction             | Semi-empirical from equivalents                                                                                                          |
| Max. and min. transmission        | 0.9846 and 0.9696                                                                                                                        |
| Refinement method                 | Full-matrix least-squares on F <sup>2</sup>                                                                                              |
| Data / restraints / parameters    | 5368 / 0 / 406                                                                                                                           |
| Goodness-of-fit on F <sup>2</sup> | 1.026                                                                                                                                    |
| Final R indices [I > 2σ(I)]       | R1 = 0.0416, wR2 = 0.1180                                                                                                                |
| R indices (all data)              | R1 = 0.0533, wR2 = 0.1292                                                                                                                |
| Largest diff. peak and hole       | 0.217 and -0.188 e.Å <sup>-3</sup>                                                                                                       |

**Table S2.** Atomic coordinates ( × 10<sup>4</sup>) and equivalent isotropic displacement parameters (Å<sup>2</sup> × 10<sup>3</sup>) for **3a**. U(eq) is defined as one third of the trace of the orthogonalized U<sub>ij</sub> tensor.

| Atom  | X        | Y         | Z        | U(eq) |
|-------|----------|-----------|----------|-------|
| O(1)  | 3507(1)  | -3681(1)  | 658(1)   | 48(1) |
| C(2)  | 1792(1)  | -1898(1)  | 1748(1)  | 36(1) |
| O(3)  | 4121(1)  | -2826(1)  | 1524(1)  | 58(1) |
| C(4)  | 1233(2)  | -2950(1)  | 763(1)   | 39(1) |
| C(5)  | 885(2)   | -2012(1)  | 1469(1)  | 39(1) |
| C(6)  | 2567(2)  | -3777 (1) | 371(1)   | 41(1) |
| C(7)  | -41(1)   | -49(1)    | 2836(1)  | 36(1) |
| C(8)  | 3193(2)  | -2790(1)  | 1336(1)  | 42(1) |
| N(9)  | -2054(1) | 1557(1)   | 3126(1)  | 46(1) |
| C(10) | 2459(1)  | 220(1)    | 360(1)   | 36(1) |
| C(11) | 3173(1)  | 966(1)    | 15(1)    | 38(1) |
| N(12) | 3342(1)  | 1121(1)   | 961(1)   | 46(1) |
| C(13) | 2204(1)  | -65(1)    | 1574(1)  | 36(1) |
| C(14) | 1470(1)  | -826(1)   | 2395(1)  | 37(1) |
| C(15) | -2288(2) | 640(1)    | 3906(1)  | 40(1) |
| C(16) | -1049(2) | -388(1)   | 3739(1)  | 37(1) |
| C(17) | 2212(2)  | -92 (2)   | -490(1)  | 42(1) |
| C(18) | 321(2)   | -3067(2)  | 426(2)   | 48(1) |
| C(19) | 3003(2)  | -4721(2)  | -305(1)  | 52(1) |
| C(20) | 3621(2)  | 1396(2)   | -1116(2) | 48(1) |
| C(21) | 2768(2)  | 494(2)    | 1876(1)  | 44(1) |
| C(22) | 3163(2)  | 2866(2)   | 1758(1)  | 43(1) |
| C(23) | 2077(2)  | -4822(2)  | -610(2)  | 57(1) |
| C(24) | -3487(2) | 629(2)    | 4716(2)  | 51(1) |
| C(25) | -702(2)  | 1118(1)   | 2498(1)  | 43(1) |
| C(26) | 745(2)   | -3991(2)  | -258(2)  | 54(1) |
| C(27) | -3106(2) | 3789(2)   | 3471(1)  | 48(1) |
| C(28) | 3361(2)  | 1060(2)   | -1915(2) | 53(1) |

|       |          |          |          |       |
|-------|----------|----------|----------|-------|
| C(29) | 4043(2)  | 1796(2)  | 1010(2)  | 53(1) |
| C(30) | -3054(2) | 2766(2)  | 2971(2)  | 56(1) |
| C(31) | -1053(2) | -1461(2) | 4400(2)  | 49(1) |
| C(32) | 2674(2)  | 318(2)   | -1609(2) | 51(1) |
| C(33) | 1931(2)  | -1291(2) | 3453(2)  | 52(1) |
| C(34) | -3437(2) | -438(2)  | 5348(2)  | 60(1) |
| C(35) | 1794(2)  | 3438(2)  | 2020(2)  | 57(1) |
| C(36) | -2240(2) | -1474(2) | 5188(2)  | 59(1) |
| C(37) | -2231(2) | 3614(2)  | 3994(2)  | 62(1) |
| C(38) | -4054(2) | 4968(2)  | 3372(2)  | 62(1) |
| C(39) | 3754(2)  | 3320(2)  | 2175(2)  | 60(1) |
| C(40) | -4115(3) | 5937(2)  | 3778(2)  | 77(1) |
| C(41) | -3238(3) | 5757(2)  | 4288(2)  | 86(1) |
| C(42) | 1034(2)  | 4454(2)  | 2673(2)  | 78(1) |
| C(43) | 2994(3)  | 4327(2)  | 2830(2)  | 82(1) |
| C(44) | -2300(3) | 4598(2)  | 4404(2)  | 82(1) |
| C(45) | 1643(3)  | 4889(2)  | 3077(2)  | 88(1) |

**Table S3.** Bond lengths [Å] and angles [deg] for **3a**.

|             |          |             |            |
|-------------|----------|-------------|------------|
| O(1)-C(8)   | 1.376(2) | O(1)-C(6)   | 1.3762(19) |
| C(2)-C(5)   | 1.343(2) | C(2)-C(8)   | 1.467(2)   |
| C(2)-C(14)  | 1.536(2) | O(3)-C(8)   | 1.2084(19) |
| C(4)-C(6)   | 1.387(2) | C(4)-C(18)  | 1.399(2)   |
| C(4)-C(5)   | 1.435(2) | C(5)-H(5A)  | 0.9300     |
| C(6)-C(19)  | 1.382(2) | C(7)-C(25)  | 1.354(2)   |
| C(7)-C(16)  | 1.444(2) | C(7)-C(14)  | 1.527(2)   |
| N(9)-C(25)  | 1.377(2) | N(9)-C(15)  | 1.382(2)   |
| N(9)-C(30)  | 1.453(2) | C(10)-C(17) | 1.405(2)   |
| C(10)-C(11) | 1.421(2) | C(10)-C(13) | 1.447(2)   |

|              |          |              |          |
|--------------|----------|--------------|----------|
| C(11)-N(12)  | 1.371(2) | C(11)-C(20)  | 1.395(2) |
| N(12)-C(21)  | 1.368(2) | N(12)-C(29)  | 1.455(2) |
| C(13)-C(21)  | 1.359(2) | C(13)-C(14)  | 1.525(2) |
| C(14)-C(33)  | 1.555(2) | C(15)-C(24)  | 1.394(2) |
| C(15)-C(16)  | 1.410(2) | C(16)-C(31)  | 1.402(2) |
| C(17)-C(32)  | 1.377(2) | C(17)-H(17A) | 0.9300   |
| C(18)-C(26)  | 1.373(2) | C(18)-H(18A) | 0.9300   |
| C(19)-C(23)  | 1.377(3) | C(19)-H(19A) | 0.9300   |
| C(20)-C(28)  | 1.371(3) | C(20)-H(20A) | 0.9300   |
| C(21)-H(21A) | 0.9300   | C(22)-C(35)  | 1.376(2) |
| C(22)-C(39)  | 1.382(2) | C(22)-C(29)  | 1.499(2) |
| C(23)-C(26)  | 1.385(3) | C(23)-H(23A) | 0.9300   |
| C(24)-C(34)  | 1.370(3) | C(24)-H(24A) | 0.9300   |
| C(25)-H(25A) | 0.9300   | C(26)-H(26A) | 0.9300   |
| C(27)-C(37)  | 1.373(3) | C(27)-C(38)  | 1.391(2) |
| C(27)-C(30)  | 1.509(3) | C(28)-C(32)  | 1.396(3) |
| C(28)-H(28A) | 0.9300   | C(29)-H(29A) | 0.9700   |
| C(29)-H(29B) | 0.9700   | C(30)-H(30A) | 0.9700   |
| C(30)-H(30B) | 0.9700   | C(31)-C(36)  | 1.375(2) |
| C(31)-H(31A) | 0.9300   | C(32)-H(32A) | 0.9300   |
| C(33)-H(33A) | 0.9600   | C(33)-H(33B) | 0.9600   |
| C(33)-H(33C) | 0.9600   | C(34)-C(36)  | 1.387(3) |
| C(34)-H(34A) | 0.9300   | C(35)-C(42)  | 1.381(3) |
| C(35)-H(35A) | 0.9300   | C(36)-H(36A) | 0.9300   |
| C(37)-C(44)  | 1.387(3) | C(37)-H(37A) | 0.9300   |
| C(38)-C(40)  | 1.373(3) | C(38)-H(38A) | 0.9300   |
| C(39)-C(43)  | 1.374(3) | C(39)-H(39A) | 0.9300   |
| C(40)-C(41)  | 1.360(4) | C(40)-H(40A) | 0.9300   |
| C(41)-C(44)  | 1.374(4) | C(41)-H(41A) | 0.9300   |

|                    |            |                    |            |
|--------------------|------------|--------------------|------------|
| C(42)-C(45)        | 1.372(4)   | C(42)-H(42A)       | 0.9300     |
| C(43)-C(45)        | 1.360(4)   | C(43)-H(43A)       | 0.9300     |
| C(44)-H(44A)       | 0.9300     | C(45)-H(45A)       | 0.9300     |
| C(8)-O(1)-C(6)     | 123.06(12) | C(5)-C(2)-C(8)     | 118.50(14) |
| C(5)-C(2)-C(14)    | 123.75(13) | C(8)-C(2)-C(14)    | 117.56(13) |
| C(6)-C(4)-C(18)    | 118.05(15) | C(6)-C(4)-C(5)     | 117.72(14) |
| C(18)-C(4)-C(5)    | 124.22(14) | C(2)-C(5)-C(4)     | 122.90(14) |
| C(2)-C(5)-H(5A)    | 118.5      | C(4)-C(5)-H(5A)    | 118.5      |
| O(1)-C(6)-C(19)    | 117.66(14) | O(1)-C(6)-C(4)     | 120.13(14) |
| C(19)-C(6)-C(4)    | 122.20(16) | C(25)-C(7)-C(16)   | 105.94(13) |
| C(25)-C(7)-C(14)   | 127.01(14) | C(16)-C(7)-C(14)   | 126.98(13) |
| O(3)-C(8)-O(1)     | 115.64(14) | O(3)-C(8)-C(2)     | 126.69(15) |
| O(1)-C(8)-C(2)     | 117.66(13) | C(25)-N(9)-C(15)   | 107.99(13) |
| C(25)-N(9)-C(30)   | 125.53(15) | C(15)-N(9)-C(30)   | 126.47(14) |
| C(17)-C(10)-C(11)  | 117.54(14) | C(17)-C(10)-C(13)  | 135.83(14) |
| C(11)-C(10)-C(13)  | 106.59(13) | N(12)-C(11)-C(20)  | 129.38(14) |
| N(12)-C(11)-C(10)  | 107.85(14) | C(20)-C(11)-C(10)  | 122.75(15) |
| C(21)-N(12)-C(11)  | 108.31(12) | C(21)-N(12)-C(29)  | 124.46(14) |
| C(11)-N(12)-C(29)  | 127.20(14) | C(21)-C(13)-C(10)  | 105.64(13) |
| C(21)-C(13)-C(14)  | 124.81(14) | C(10)-C(13)-C(14)  | 129.54(13) |
| C(13)-C(14)-C(7)   | 110.49(12) | C(13)-C(14)-C(2)   | 108.20(12) |
| C(7)-C(14)-C(2)    | 110.30(12) | C(13)-C(14)-C(33)  | 109.55(12) |
| C(7)-C(14)-C(33)   | 107.30(12) | C(2)-C(14)-C(33)   | 111.02(13) |
| N(9)-C(15)-C(24)   | 129.91(15) | N(9)-C(15)-C(16)   | 107.63(13) |
| C(24)-C(15)-C(16)  | 122.43(15) | C(31)-C(16)-C(15)  | 117.73(14) |
| C(31)-C(16)-C(7)   | 135.09(15) | C(15)-C(16)-C(7)   | 107.13(13) |
| C(32)-C(17)-C(10)  | 119.52(15) | C(32)-C(17)-H(17A) | 120.2      |
| C(10)-C(17)-H(17A) | 120.2      | C(26)-C(18)-C(4)   | 120.27(16) |
| C(26)-C(18)-H(18A) | 119.9      | C(4)-C(18)-H(18A)  | 119.9      |



|                     |            |                     |            |
|---------------------|------------|---------------------|------------|
| C(23)-C(19)-C(6)    | 118.37(17) | C(23)-C(19)-H(19A)  | 120.8      |
| C(6)-C(19)-H(19A)   | 120.8      | C(28)-C(20)-C(11)   | 117.51(16) |
| C(28)-C(20)-H(20A)  | 121.2      | C(11)-C(20)-H(20A)  | 121.2      |
| C(13)-C(21)-N(12)   | 111.60(14) | C(13)-C(21)-H(21A)  | 124.2      |
| N(12)-C(21)-H(21A)  | 124.2      | C(35)-C(22)-C(39)   | 118.50(17) |
| C(35)-C(22)-C(29)   | 122.77(16) | C(39)-C(22)-C(29)   | 118.71(16) |
| C(19)-C(23)-C(26)   | 120.80(16) | C(19)-C(23)-H(23A)  | 119.6      |
| C(26)-C(23)-H(23A)  | 119.6      | C(34)-C(24)-C(15)   | 117.61(17) |
| C(34)-C(24)-H(24A)  | 121.2      | C(15)-C(24)-H(24A)  | 121.2      |
| C(7)-C(25)-N(9)     | 111.29(14) | C(7)-C(25)-H(25A)   | 124.4      |
| N(9)-C(25)-H(25A)   | 124.4      | C(18)-C(26)-C(23)   | 120.27(17) |
| C(18)-C(26)-H(26A)  | 119.9      | C(23)-C(26)-H(26A)  | 119.9      |
| C(37)-C(27)-C(38)   | 118.25(18) | C(37)-C(27)-C(30)   | 122.84(16) |
| C(38)-C(27)-C(30)   | 118.88(17) | C(20)-C(28)-C(32)   | 121.32(17) |
| C(20)-C(28)-H(28A)  | 119.3      | C(32)-C(28)-H(28A)  | 119.3      |
| N(12)-C(29)-C(22)   | 113.93(14) | N(12)-C(29)-H(29A)  | 108.8      |
| C(22)-C(29)-H(29A)  | 108.8      | N(12)-C(29)-H(29B)  | 108.8      |
| C(22)-C(29)-H(29B)  | 108.8      | H(29A)-C(29)-H(29B) | 107.7      |
| N(9)-C(30)-C(27)    | 115.72(15) | N(9)-C(30)-H(30A)   | 108.4      |
| C(27)-C(30)-H(30A)  | 108.4      | N(9)-C(30)-H(30B)   | 108.4      |
| C(27)-C(30)-H(30B)  | 108.4      | H(30A)-C(30)-H(30B) | 107.4      |
| C(36)-C(31)-C(16)   | 119.72(17) | C(36)-C(31)-H(31A)  | 120.1      |
| C(16)-C(31)-H(31A)  | 120.1      | C(17)-C(32)-C(28)   | 121.35(16) |
| C(17)-C(32)-H(32A)  | 119.3      | C(28)-C(32)-H(32A)  | 119.3      |
| C(14)-C(33)-H(33A)  | 109.5      | C(14)-C(33)-H(33B)  | 109.5      |
| H(33A)-C(33)-H(33B) | 109.5      | C(14)-C(33)-H(33C)  | 109.5      |
| H(33A)-C(33)-H(33C) | 109.5      | H(33B)-C(33)-H(33C) | 109.5      |
| C(24)-C(34)-C(36)   | 121.47(17) | C(24)-C(34)-H(34A)  | 119.3      |
| C(36)-C(34)-H(34A)  | 119.3      | C(22)-C(35)-C(42)   | 120.6(2)   |

|                    |            |                    |          |
|--------------------|------------|--------------------|----------|
| C(22)-C(35)-H(35A) | 119.7      | C(42)-C(35)-H(35A) | 119.7    |
| C(31)-C(36)-C(34)  | 121.02(17) | C(31)-C(36)-H(36A) | 119.5    |
| C(34)-C(36)-H(36A) | 119.5      | C(27)-C(37)-C(44)  | 120.2(2) |
| C(27)-C(37)-H(37A) | 119.9      | C(44)-C(37)-H(37A) | 119.9    |
| C(40)-C(38)-C(27)  | 121.2(2)   | C(40)-C(38)-H(38A) | 119.4    |
| C(27)-C(38)-H(38A) | 119.4      | C(43)-C(39)-C(22)  | 120.8(2) |
| C(43)-C(39)-H(39A) | 119.6      | C(22)-C(39)-H(39A) | 119.6    |
| C(41)-C(40)-C(38)  | 120.1(2)   | C(41)-C(40)-H(40A) | 119.9    |
| C(38)-C(40)-H(40A) | 119.9      | C(40)-C(41)-C(44)  | 119.6(2) |
| C(40)-C(41)-H(41A) | 120.2      | C(44)-C(41)-H(41A) | 120.2    |
| C(45)-C(42)-C(35)  | 119.9(2)   | C(45)-C(42)-H(42A) | 120.1    |
| C(35)-C(42)-H(42A) | 120.1      | C(45)-C(43)-C(39)  | 120.1(2) |
| C(45)-C(43)-H(43A) | 119.9      | C(39)-C(43)-H(43A) | 119.9    |
| C(41)-C(44)-C(37)  | 120.6(2)   | C(41)-C(44)-H(44A) | 119.7    |
| C(37)-C(44)-H(44A) | 119.7      | C(43)-C(45)-C(42)  | 120.1(2) |
| C(43)-C(45)-H(45A) | 119.9      | C(42)-C(45)-H(45A) | 119.9    |

**Table S4.** Anisotropic displacement parameters ( $\text{Å}^2 \times 10^3$ ) for **3a**. The anisotropic displacement factor exponent takes the form:  $-2 \pi^2 [ h^2 a^{*2} U_{11} + \dots + 2 h k a^* b^* U_{12} ]$

| Atom | U11   | U22   | U33   | U23    | U13    | U12    |
|------|-------|-------|-------|--------|--------|--------|
| O(1) | 33(1) | 41(1) | 62(1) | -12(1) | -10(1) | -10(1) |
| C(2) | 33(1) | 32(1) | 39(1) | 0(1)   | -11(1) | -13(1) |
| O(3) | 33(1) | 56(1) | 83(1) | -13(1) | 21(1)  | -12(1) |
| C(4) | 39(1) | 33(1) | 44(1) | -1 (1) | -13(1) | -15(1) |
| C(5) | 31(1) | 33(1) | 46(1) | -5(1)  | -11(1) | -9(1)  |
| C(6) | 39(1) | 36(1) | 45(1) | -1(1)  | -10(1) | -16(1) |
| C(7) | 36(1) | 37(1) | 33(1) | -5(1)  | -10(1) | -15(1) |
| C(8) | 35(1) | 37(1) | 48(1) | -1(1)  | -11(1) | -15(1) |

|       |       |       |       |         |         |        |
|-------|-------|-------|-------|---------|---------|--------|
| N(9)  | 39(1) | 38(1) | 53(1) | -2(1)   | -15(1)  | -10(1) |
| C(10) | 29(1) | 34(1) | 40(1) | -7(1)   | -11(1)  | -10(1) |
| C(11) | 32(1) | 38(1) | 42(1) | -10(1)  | -8(1)   | -13(1) |
| N(12) | 46(1) | 55(1) | 46(1) | -11(1)  | -9(1)   | -30(1) |
| C(13) | 33(1) | 38(1) | 38(1) | -6(1)   | -11(1)  | -14(1) |
| C(14) | 35(1) | 38(1) | 38(1) | -2(1)   | -14(1)  | -14(1) |
| C(15) | 41(1) | 44(1) | 36(1) | -9(1)   | -11(1)  | -17(1) |
| C(16) | 39(1) | 39(1) | 33(1) | -7(1)   | -10(1)  | -15(1) |
| C(17) | 40(1) | 45(1) | 45(1) | -6(1)   | -17(1)  | -17(1) |
| C(18) | 47(1) | 38(1) | 60(1) | -3(1)   | -22(1)  | -16(1) |
| C(19) | 51(1) | 39(1) | 52(1) | -101(1) | -7(1)   | -14(1) |
| C(20) | 41(1) | 48(1) | 49(2) | -4 (1)  | -6(1)   | -21(1) |
| C(21) | 46(1) | 54(1) | 40(1) | -9(1)   | 13(1)   | -25(1) |
| C(22) | 50(1) | 43(1) | 42(1) | 2(1)    | -17(1)  | -26(1) |
| C(23) | 74(1) | 44(1) | 54(1) | -9(1)   | -18(1)  | -27(1) |
| C(24) | 38(1) | 64(1) | 48(1) | -16(1)  | -7(1)   | -17(1) |
| C(25) | 42(1) | 41(1) | 43(1) | 0(1)    | -12(1)  | -19(1) |
| C(26) | 66(1) | 47(1) | 61(1) | -2(1)   | -29(1)  | -28(1) |
| C(27) | 42(1) | 45(1) | 42(1) | -2(1)   | -9(1)   | -12(1) |
| C(28) | 49(1) | 60(1) | 39(1) | -11(1)  | -8(1)   | -20(1) |
| C(29) | 46(1) | 60(1) | 65(1) | -14 (1) | -13(1)  | -31(1) |
| C(30) | 48(1) | 47(1) | 68(1) | 1(1)    | -28(1)  | -11(1) |
| C(31) | 51(1) | 45(1) | 46(1) | 0(1)    | -13(1)  | -20(1) |
| C(32) | 52(1) | 57(1) | 44(1) | -9(1)   | -20(1)  | -17(1) |
| C(33) | 52(1) | 61(1) | 48(1) | 4(1)    | -25 (1) | -25(1) |
| C(34) | 53(1) | 81(1) | 45(1) | -7(1)   | -3(1)   | -38(1) |
| C(35) | 54(1) | 54(1) | 62(1) | -2(1)   | -21(1)  | -22(1) |
| C(36) | 66(1) | 63(1) | 48(1) | 6(1)    | -11(1)  | -37(1) |
| C(37) | 61(1) | 59(1) | 56(1) | -10(1)  | -20(1)  | -13(1) |

|       |        |       |       |         |        |        |
|-------|--------|-------|-------|---------|--------|--------|
| C(38) | 54(1)  | 50(1) | 60(1) | -3 (1)  | -14(1) | -9(1)  |
| C(39) | 75(1)  | 65(1) | 60(1) | -1(1)   | -27(1) | -43(1) |
| C(40) | 84(2)  | 47(1) | 70(2) | -13 (1) | -10(1) | -13(1) |
| C(41) | 100(2) | 67(2) | 82(2) | -28(1)  | -12(2) | -33(1) |
| C(42) | 69(1)  | 57(1) | 75(2) | -4(1)   | -11(1) | -12(1) |
| C(43) | 121(2) | 76(2) | 72(2) | -14(1)  | -29(2) | -58(2) |
| C(44) | 85(2)  | 91(2) | 75(2) | -27(1)  | -26(1) | -32(1) |
| C(45) | 124(2) | 52(1) | 70(2) | -14(1)  | -18(2) | -32(2) |

**Table S5.** Hydrogen coordinates (  $\times 10^4$ ) and isotropic displacement parameters ( $\text{Å}^2 \times 10^3$ ) for **3a**.

| Atom   | X     | Y     | Z     | U(eq) |
|--------|-------|-------|-------|-------|
| H(5A)  | -8    | -1459 | 1746  | 47    |
| H(17A) | 1740  | -573  | -299  | 51    |
| H(18A) | -577  | -2517 | 666   | 57    |
| H(19A) | 3899  | -5274 | -548  | 62    |
| H(20A) | 4078  | 1891  | -1321 | 57    |
| H(21A) | 2764  | 456   | 2613  | 53    |
| H(23A) | 2350  | -5456 | -1057 | 68    |
| H(24A) | -4292 | 1321  | 4823  | 62    |
| H(25A) | -296  | 1566  | 1917  | 52    |
| H(26A) | 136   | -4059 | -486  | 65    |
| H(28A) | 3649  | 1333  | -2676 | 64    |
| H(29A) | 4440  | 2085  | 240   | 64    |
| H(29B) | 4767  | 1244  | 1292  | 64    |
| H(30A) | -3930 | 2745  | 3313  | 67    |
| H(30B) | -2884 | 2952  | 2156  | 67    |
| H(31A) | -256  | -2160 | 4306  | 59    |
| H(32A) | 2525  | 96    | -2173 | 61    |

|        |       |       |      |     |
|--------|-------|-------|------|-----|
| H(33A) | 1725  | -606  | 3839 | 78  |
| H(33B) | 2881  | -1782 | 3205 | 78  |
| H(33C) | 1471  | -1772 | 3967 | 78  |
| H(34A) | -4222 | -467  | 5896 | 71  |
| H(35A) | 1377  | 3139  | 1756 | 69  |
| H(36A) | -2240 | -2190 | 5619 | 71  |
| H(37A) | -1590 | 2833  | 4074 | 75  |
| H(38A) | -4659 | 5102  | 3024 | 74  |
| H(39A) | 4678  | 2940  | 2010 | 72  |
| H(40A) | -4757 | 6719  | 3704 | 92  |
| H(41A) | -3272 | 6414  | 4557 | 104 |
| H(42A) | 111   | 4842  | 2838 | 94  |
| H(43A) | 3405  | 4624  | 3104 | 99  |
| H(44A) | -1706 | 4472  | 4760 | 99  |
| H(45A) | 1131  | 5569  | 3521 | 105 |

---

#### 4. Copies of $^1\text{H}$ NMR and $^{13}\text{C}$ NMR spectra

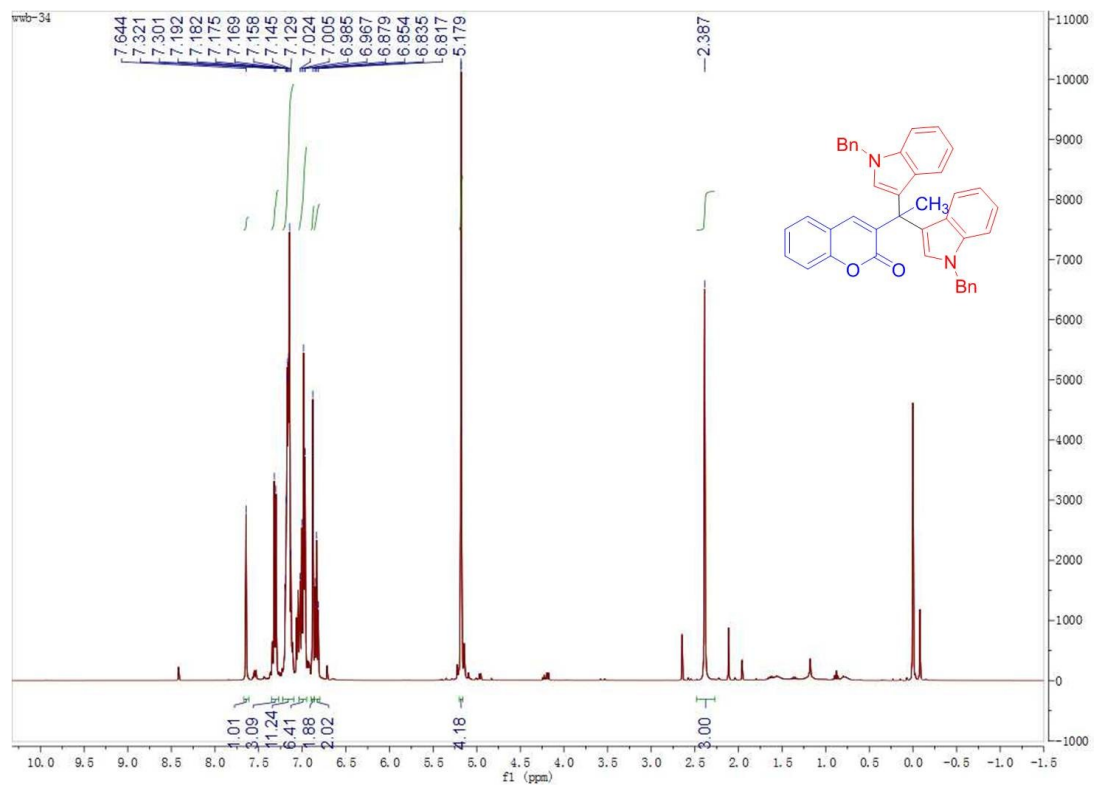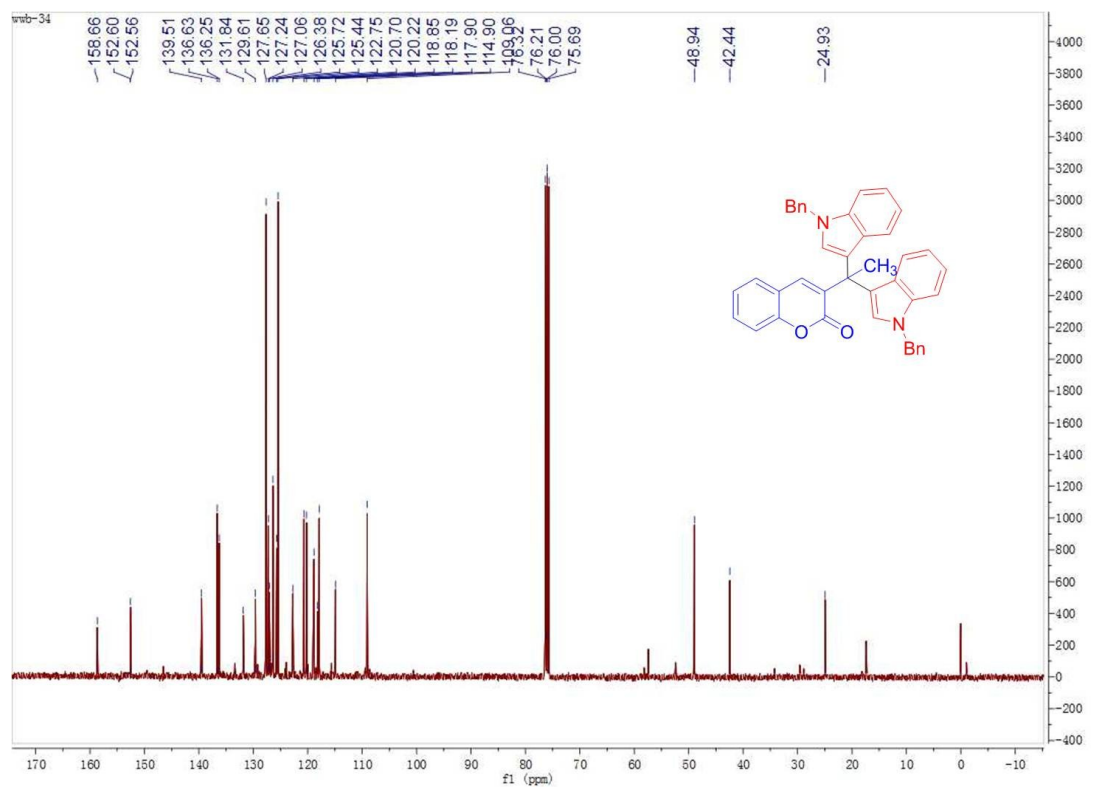

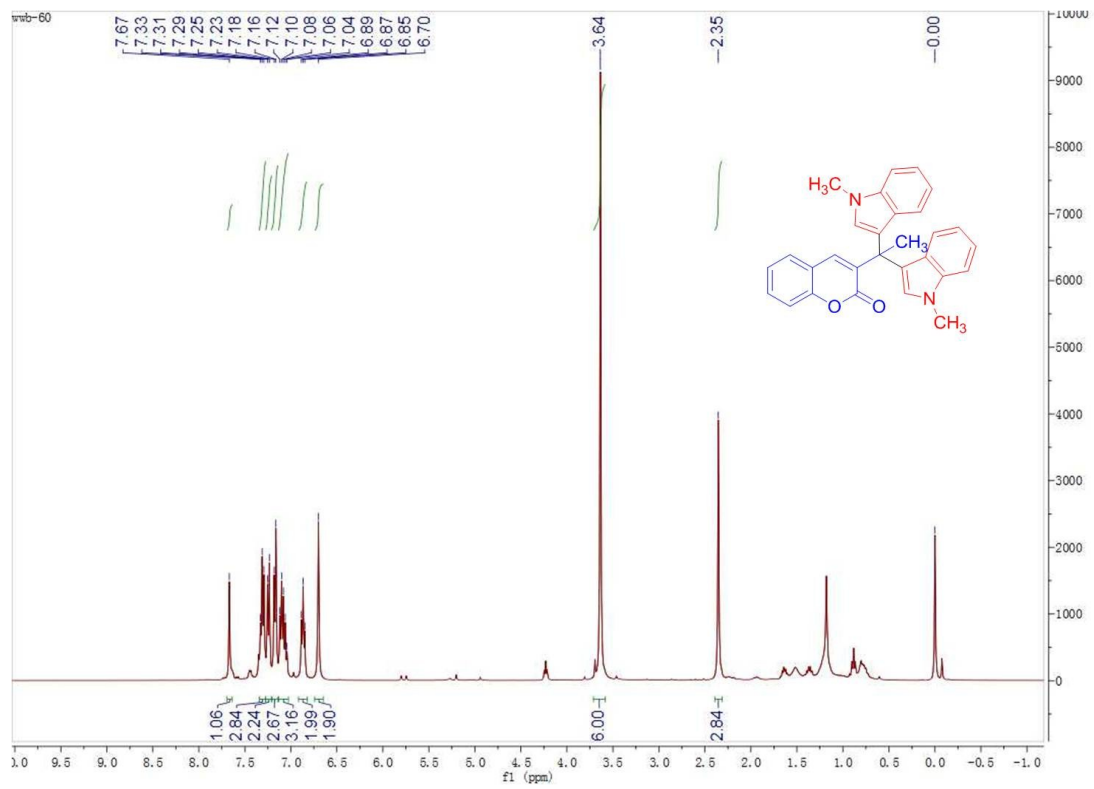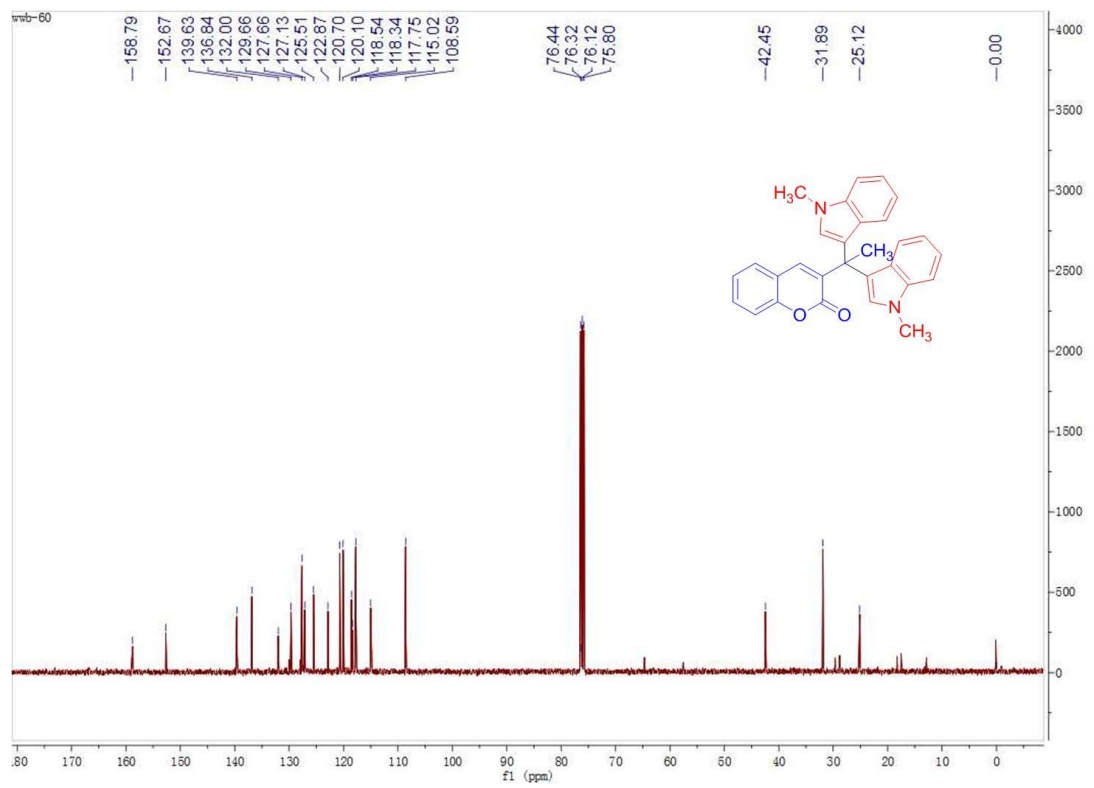

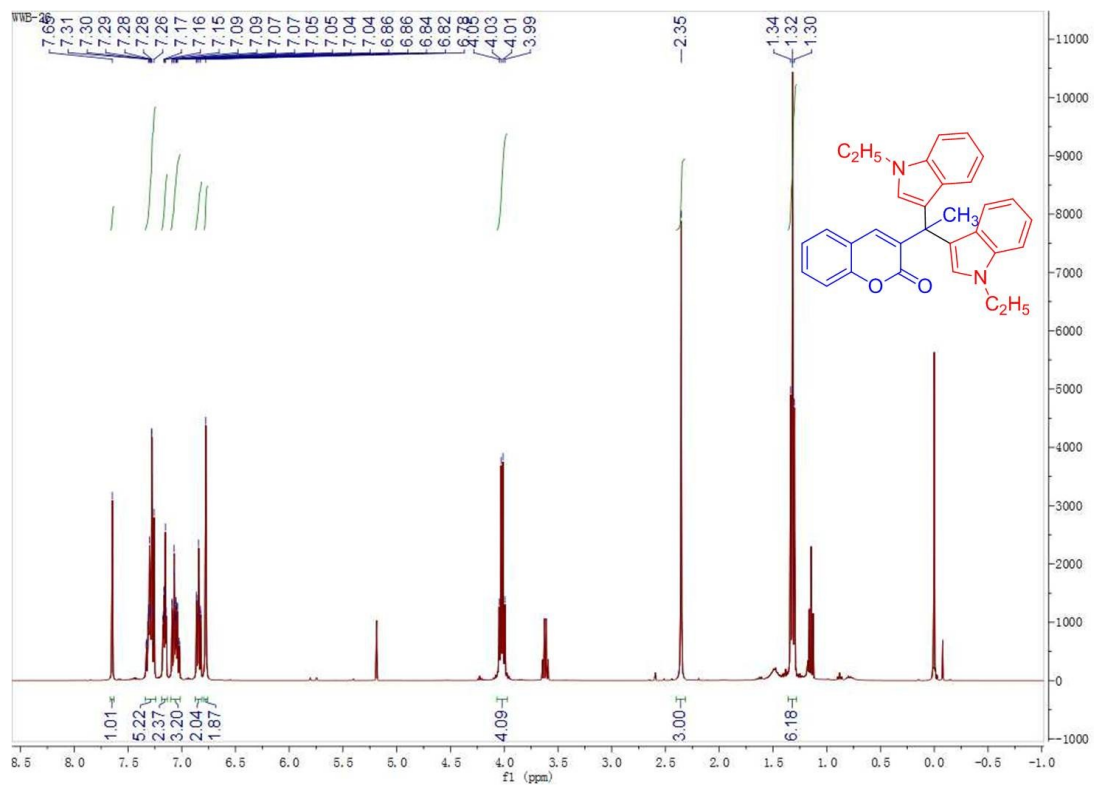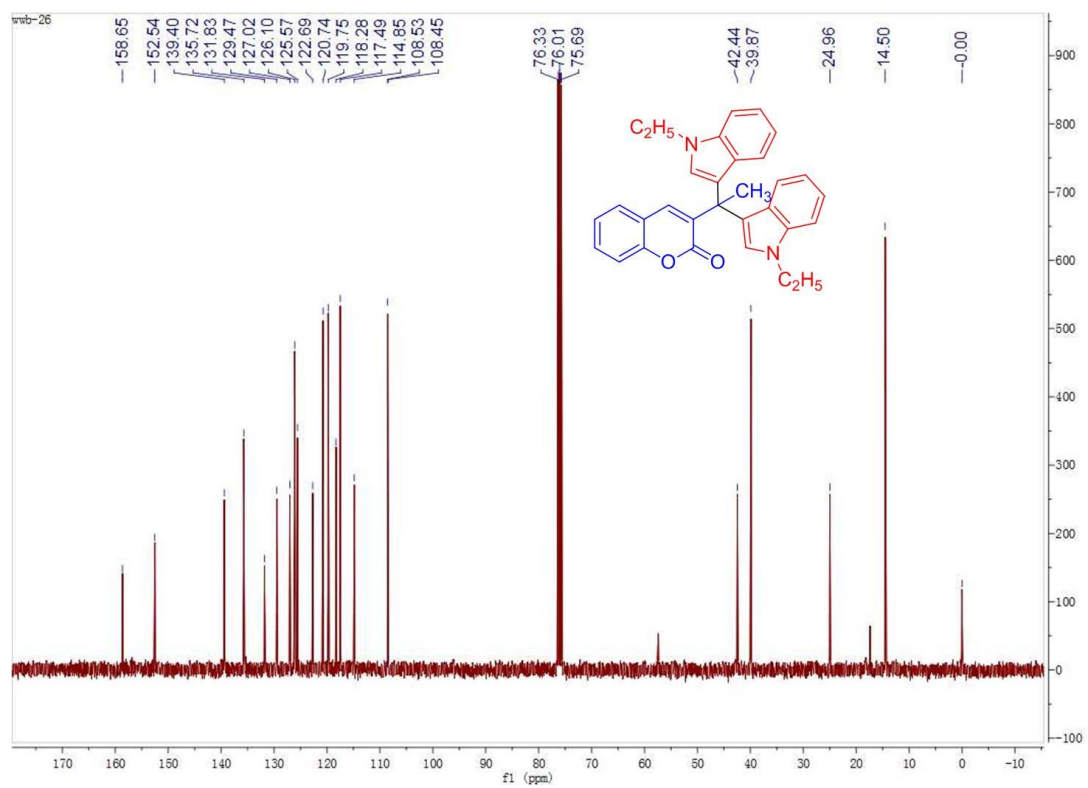



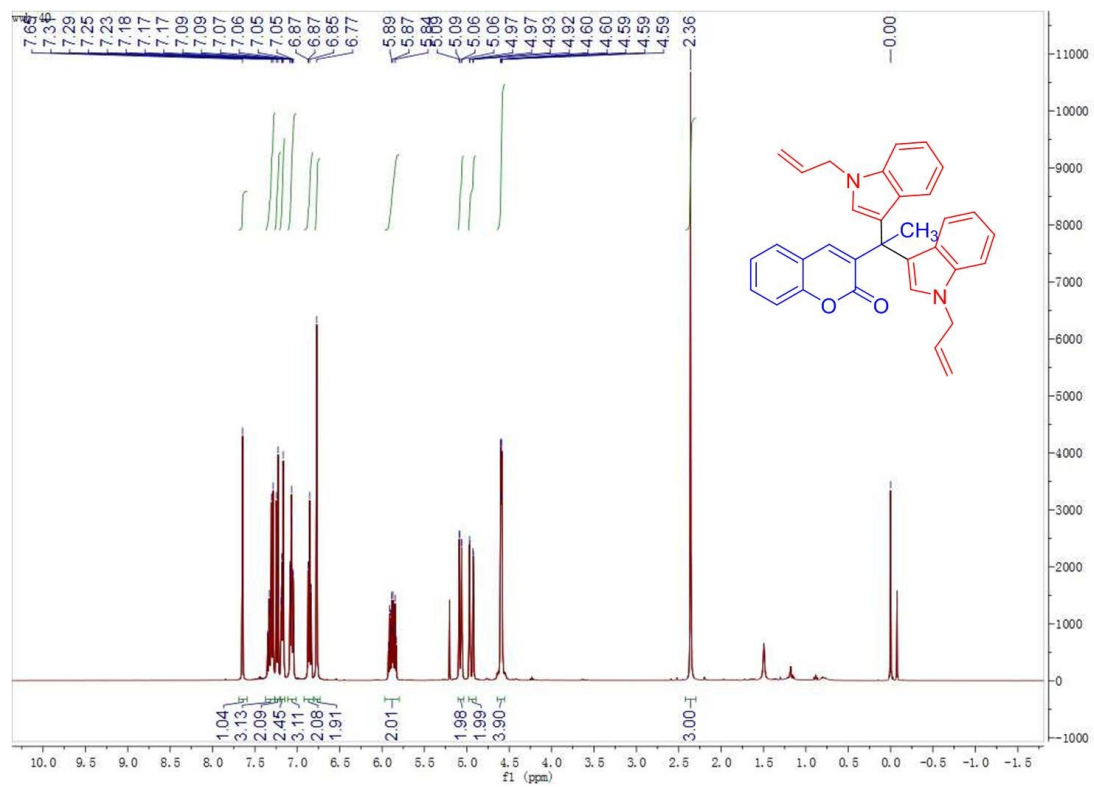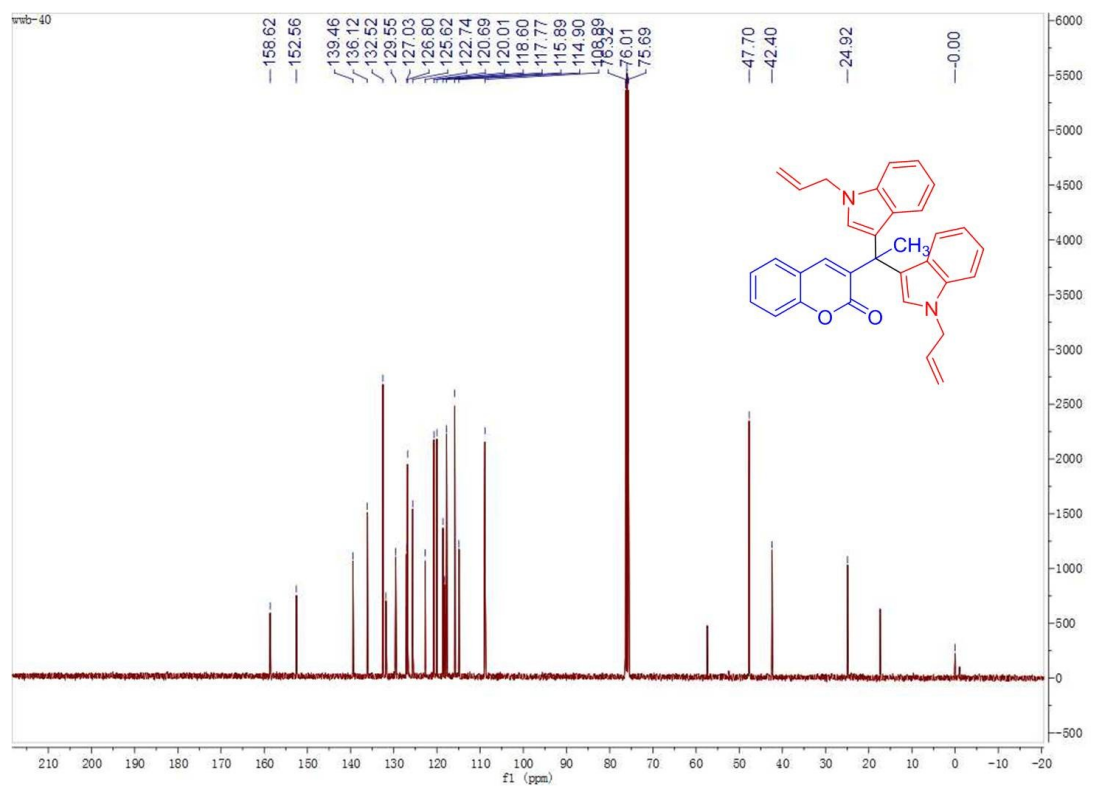

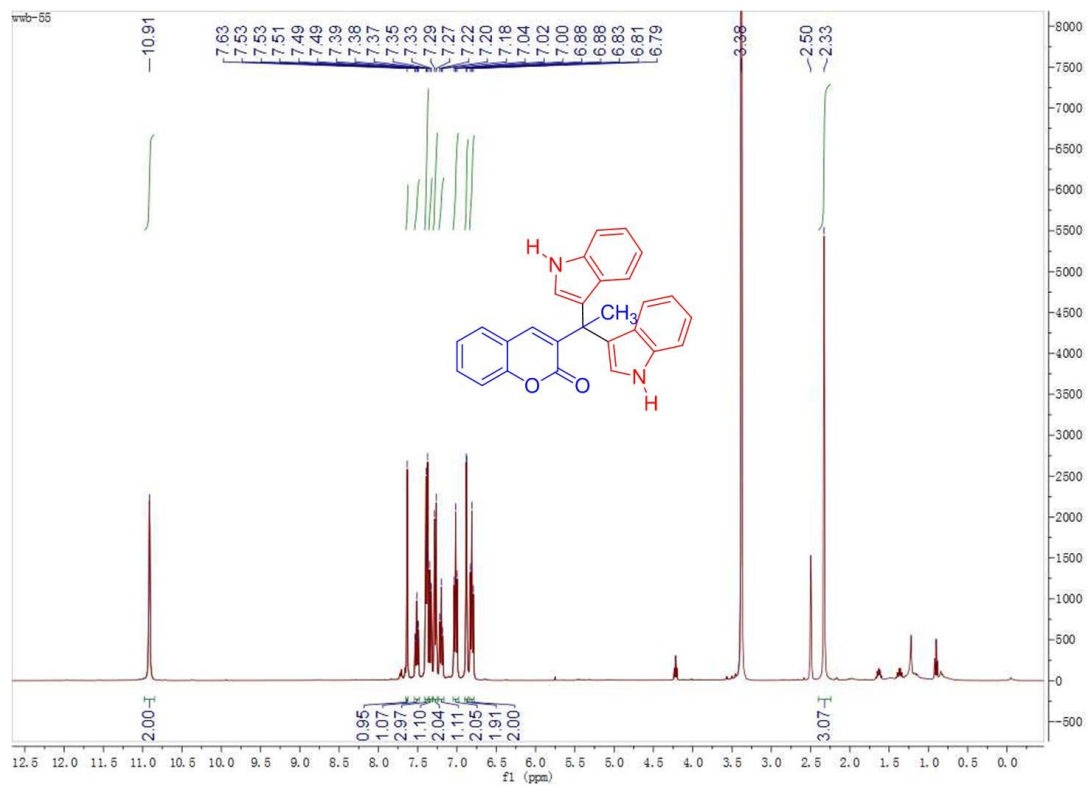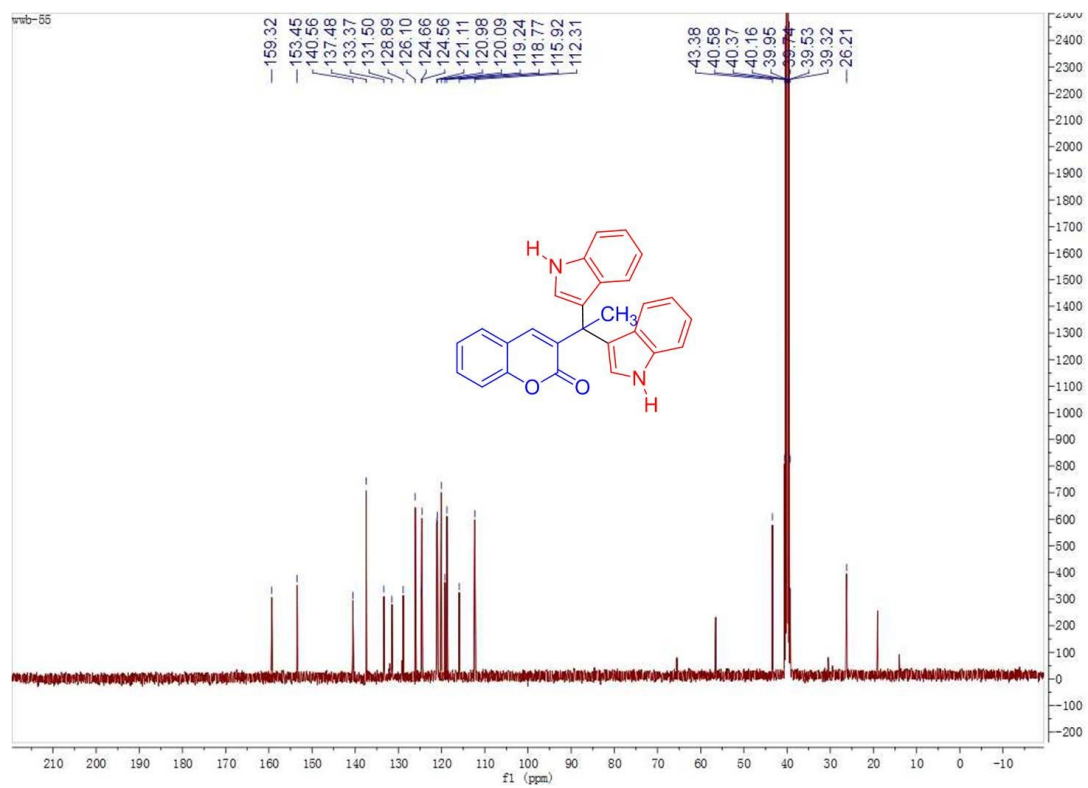

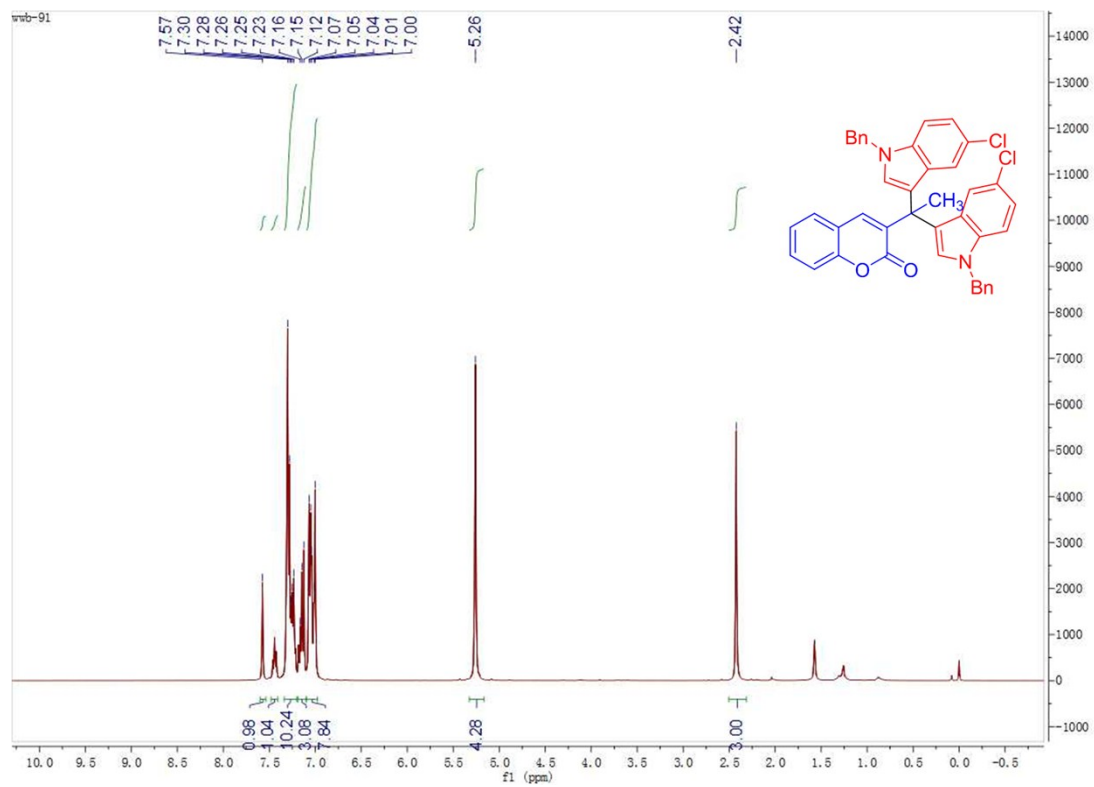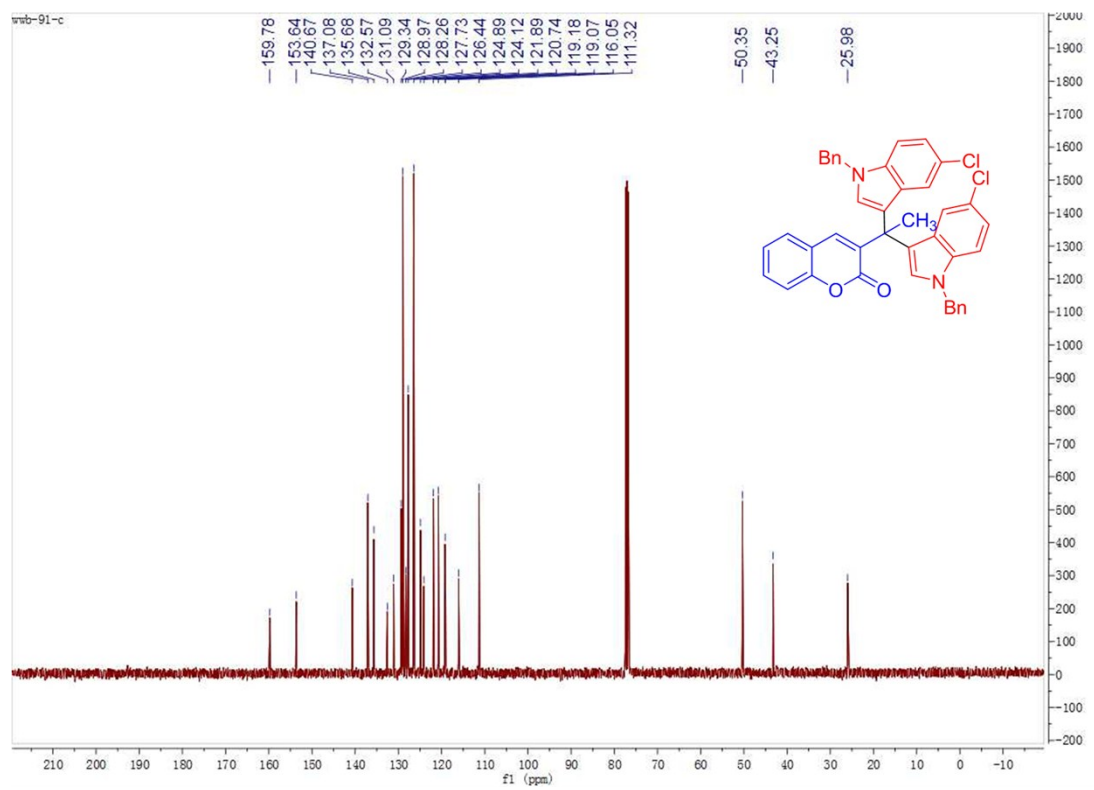

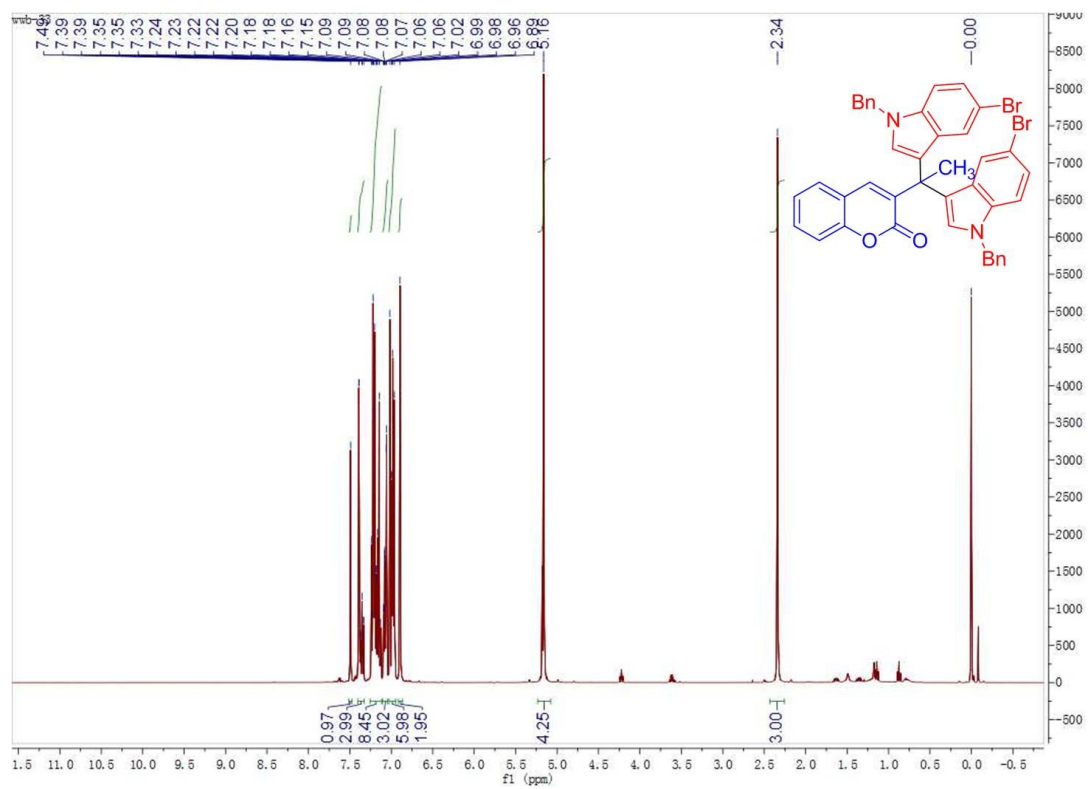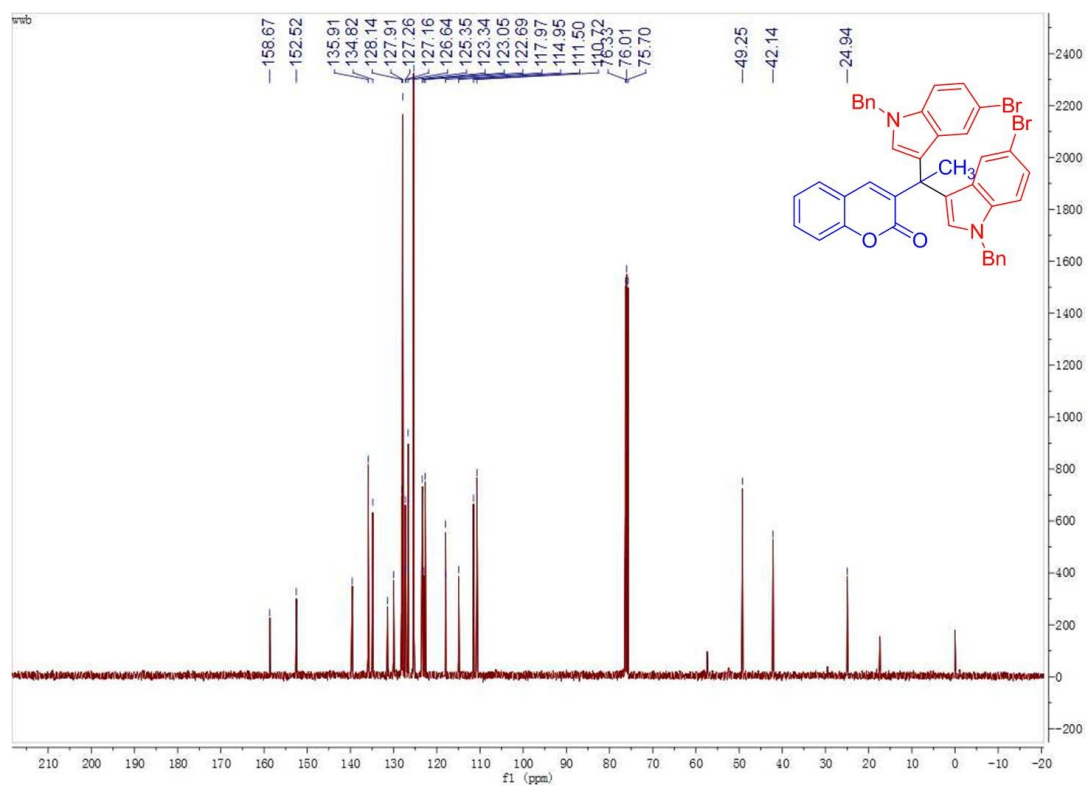

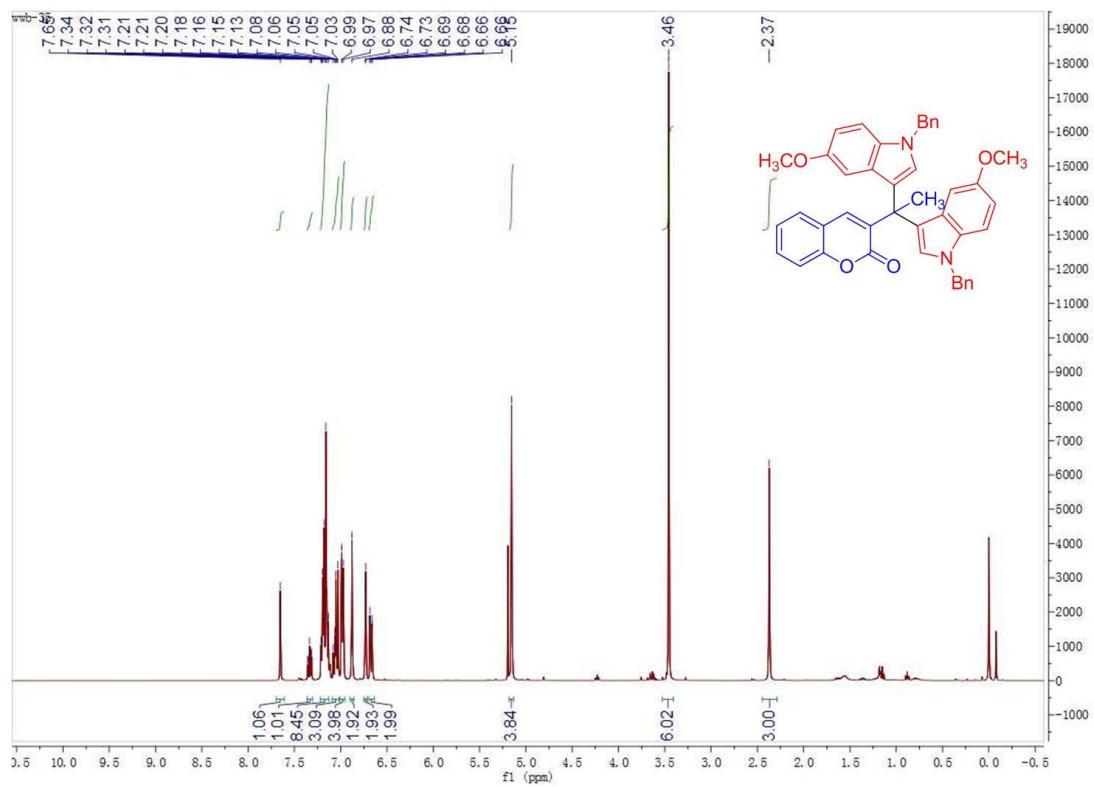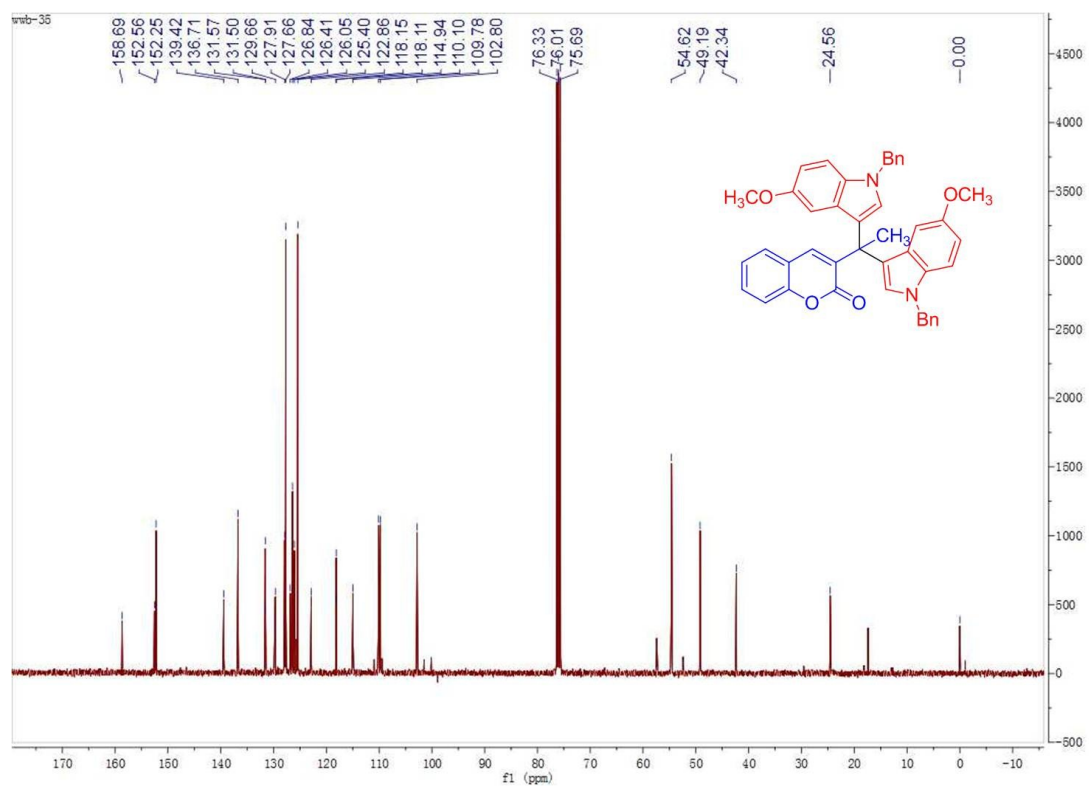

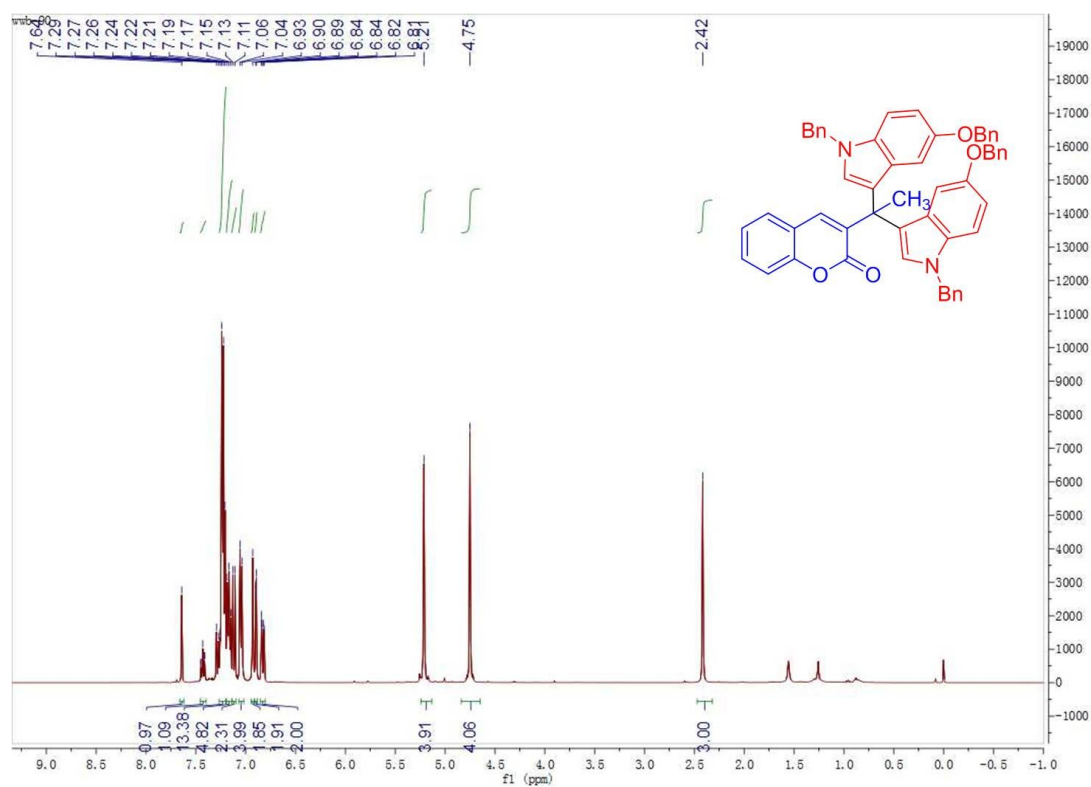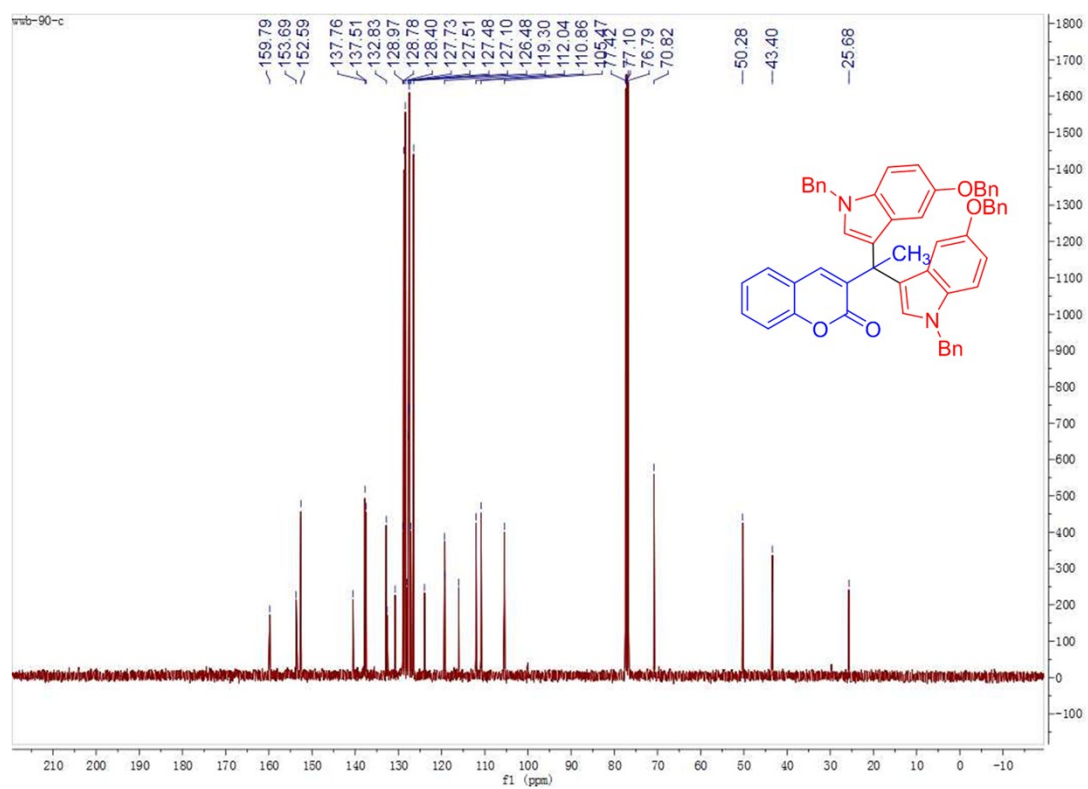

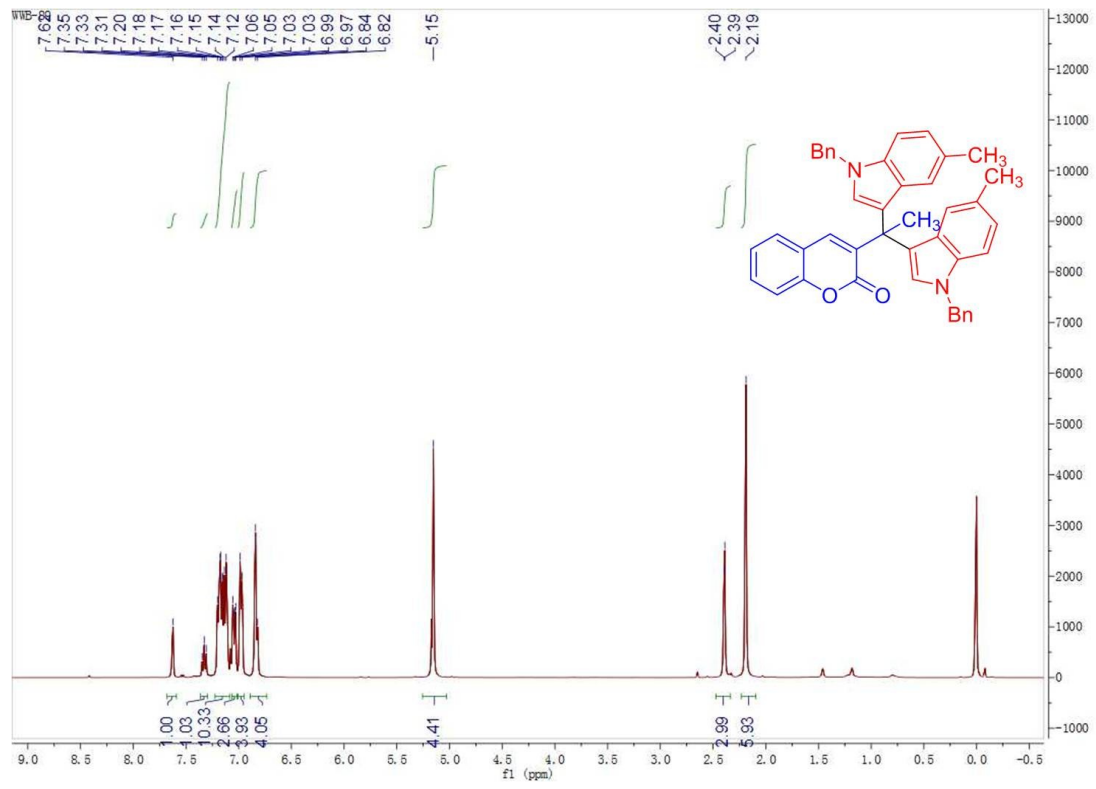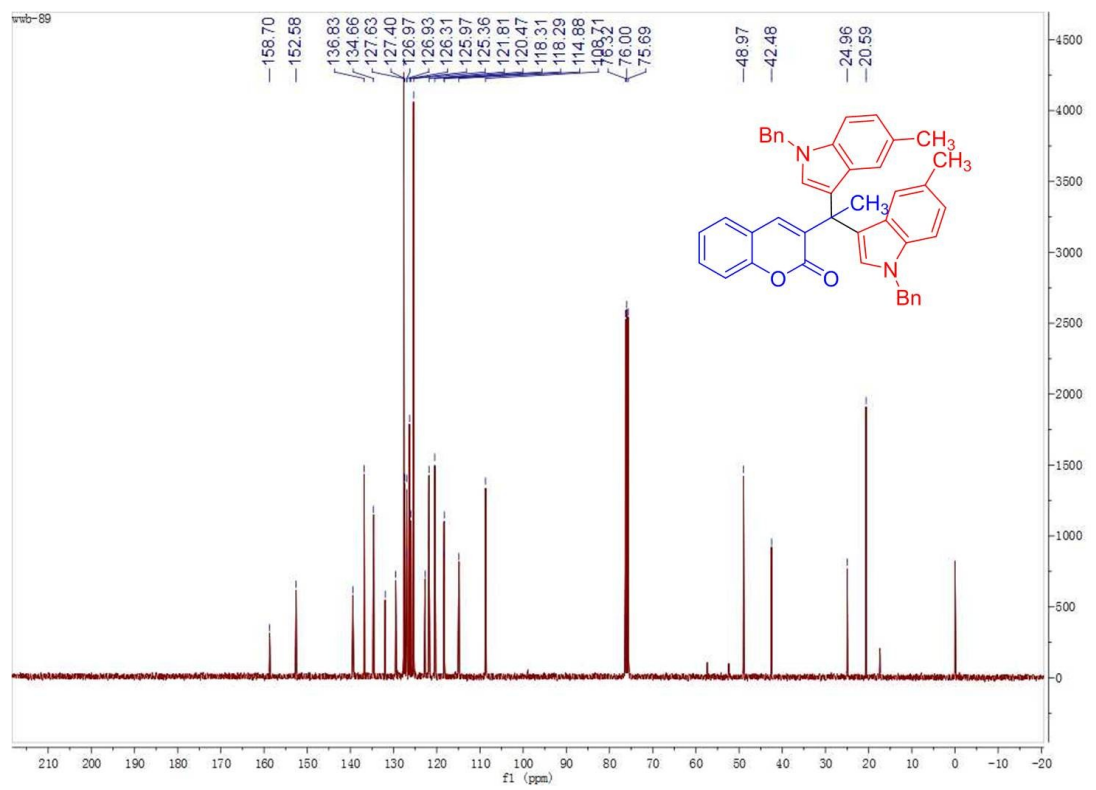

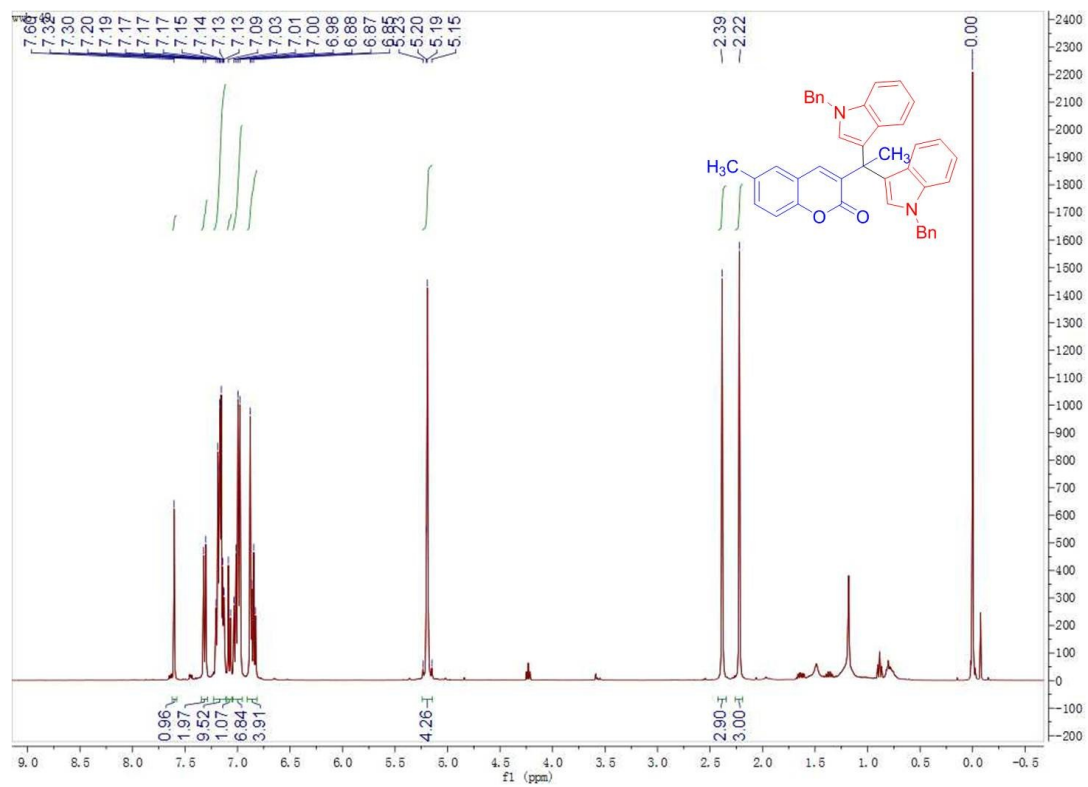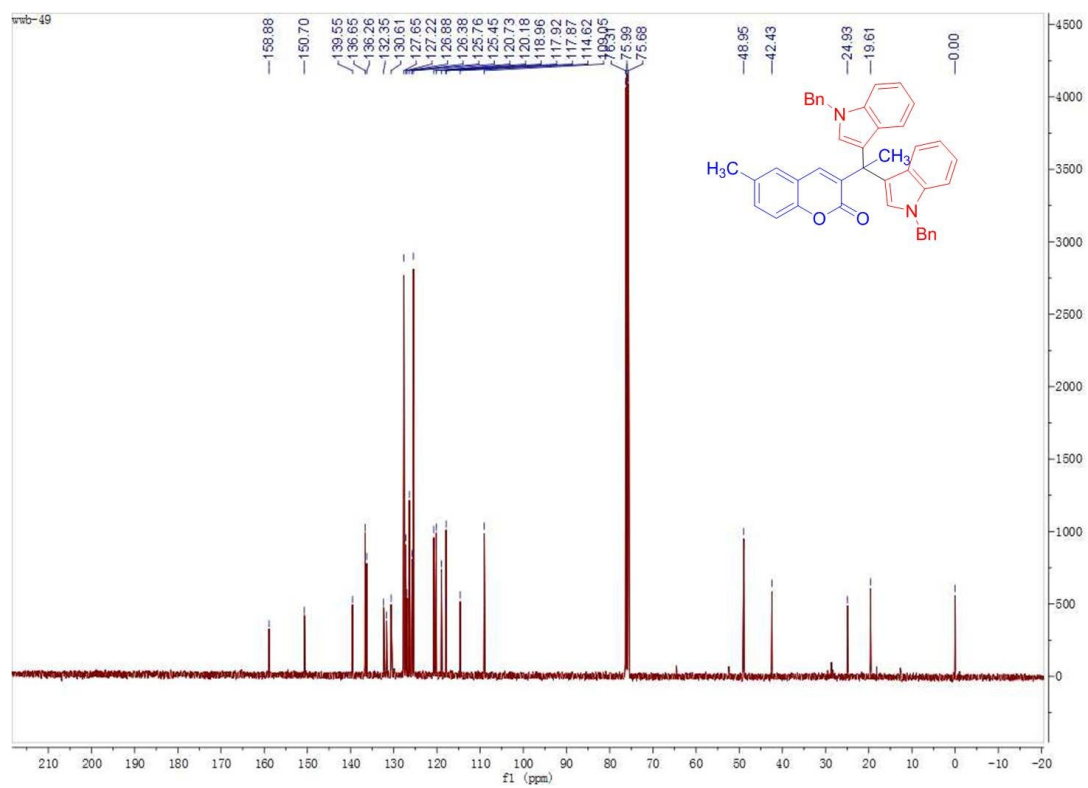



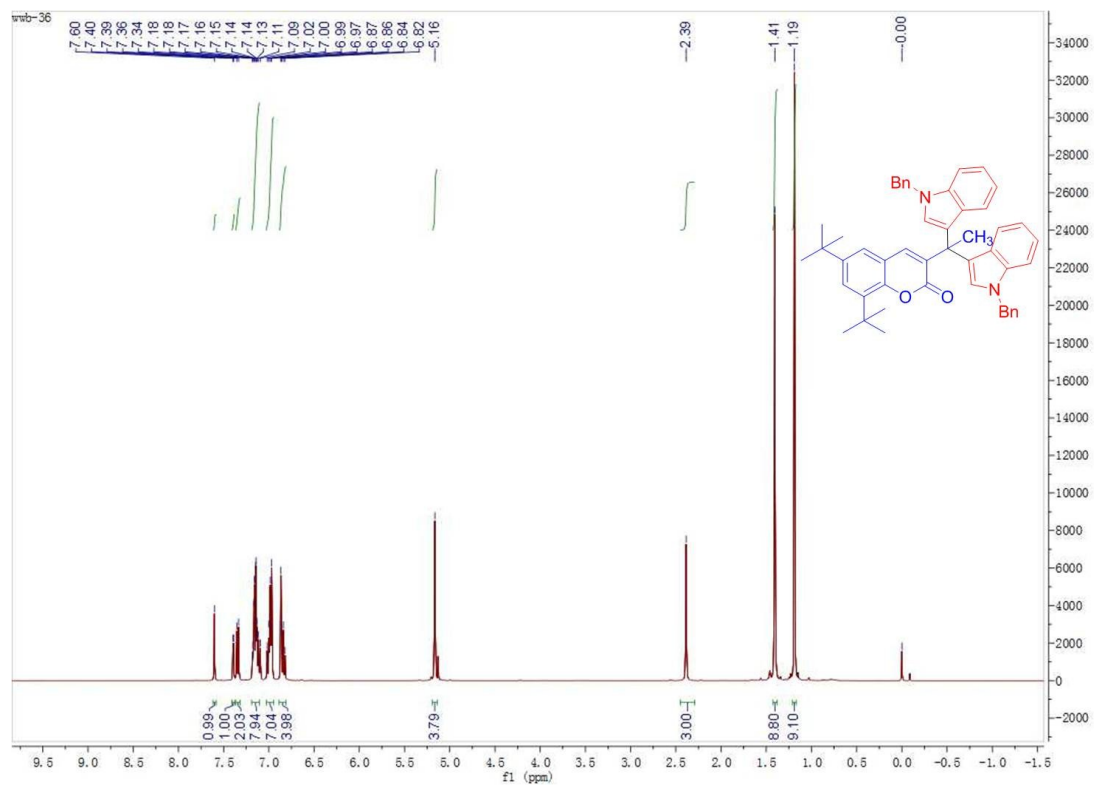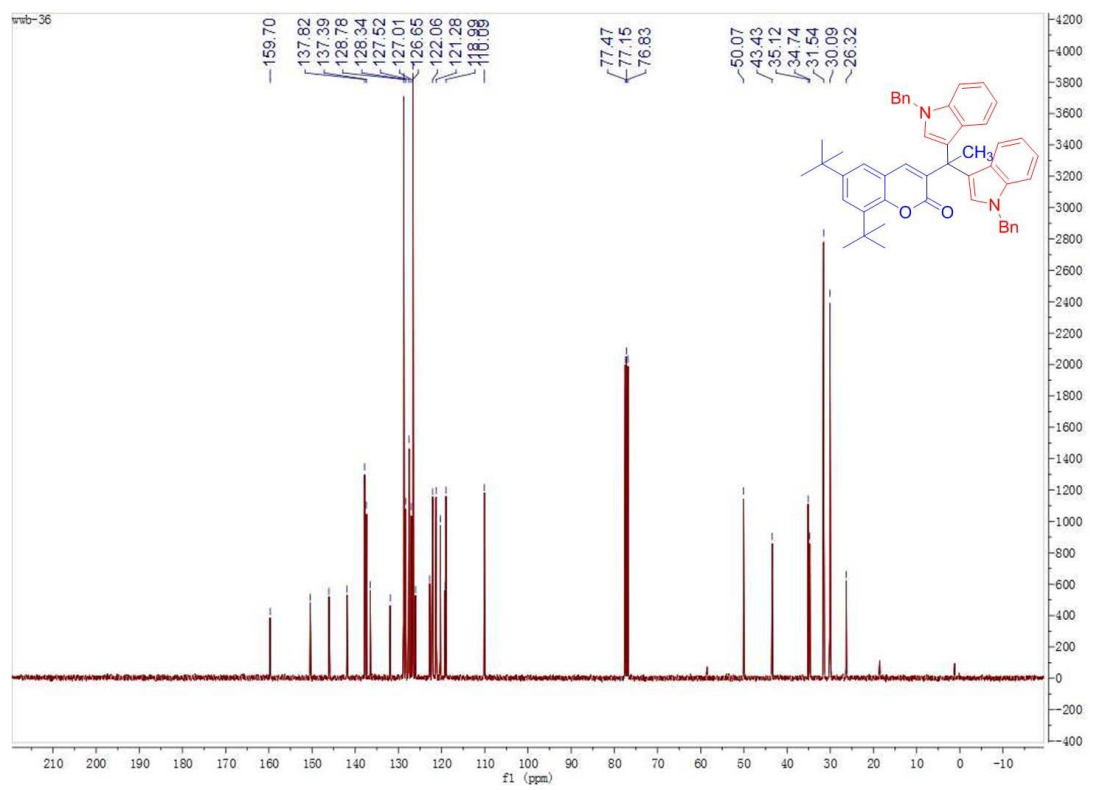

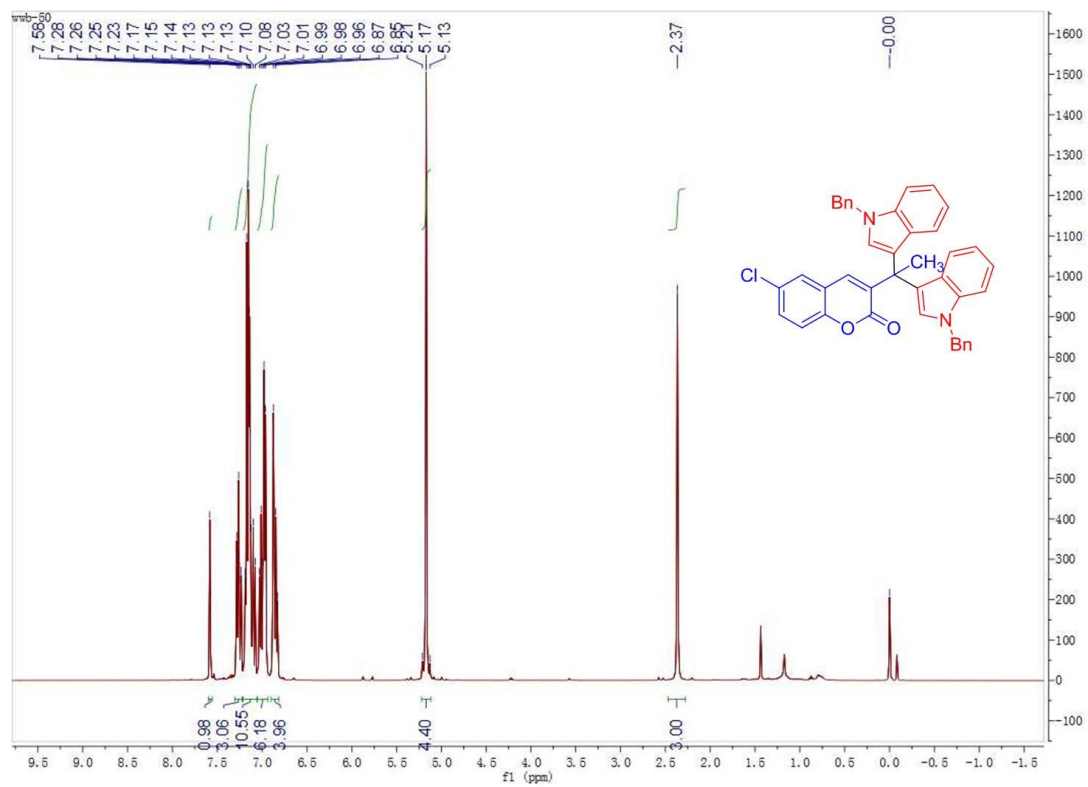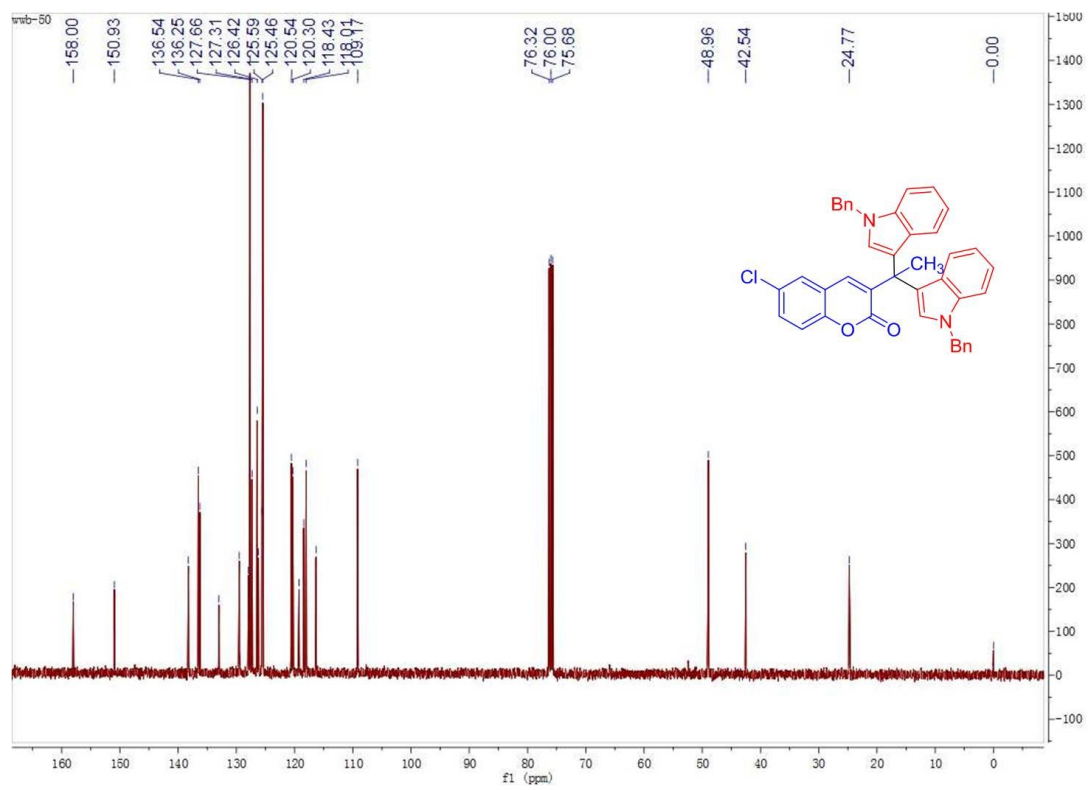

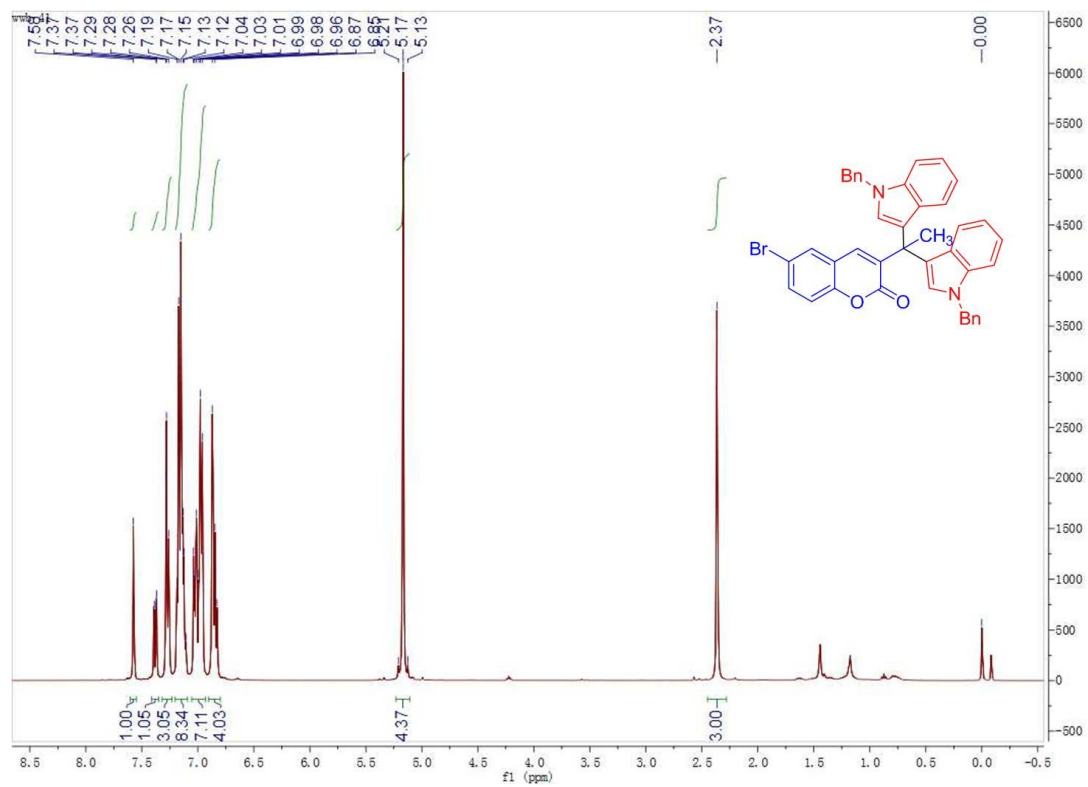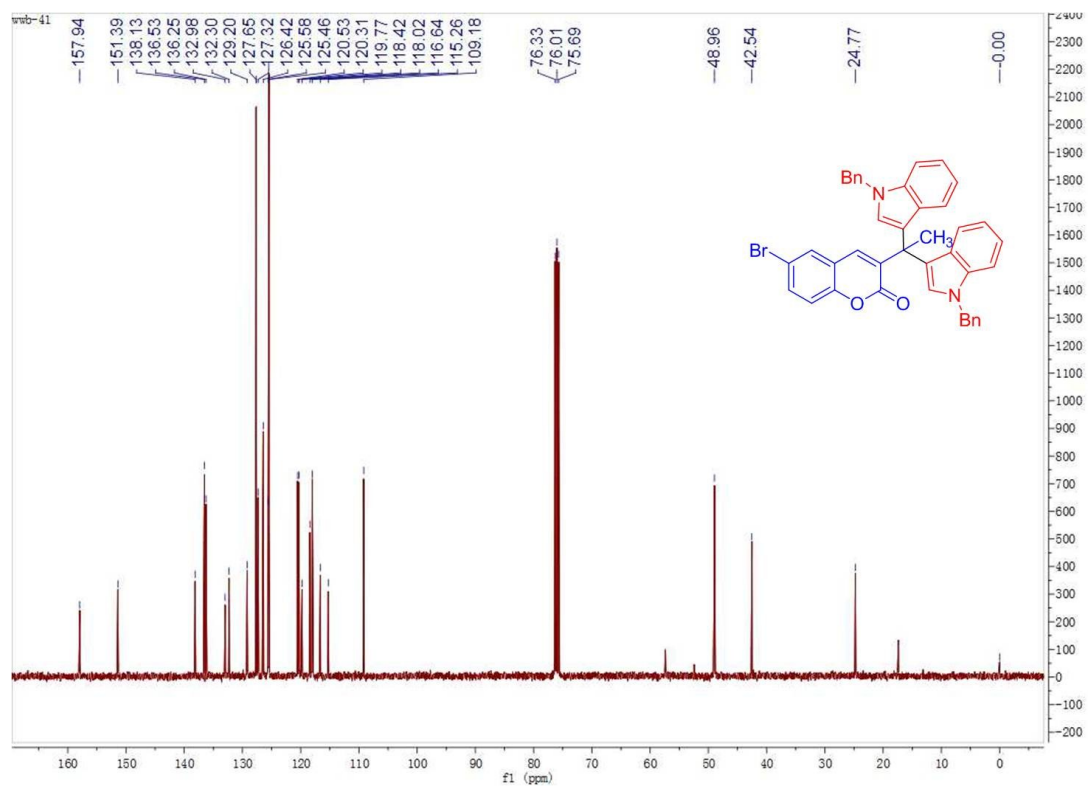

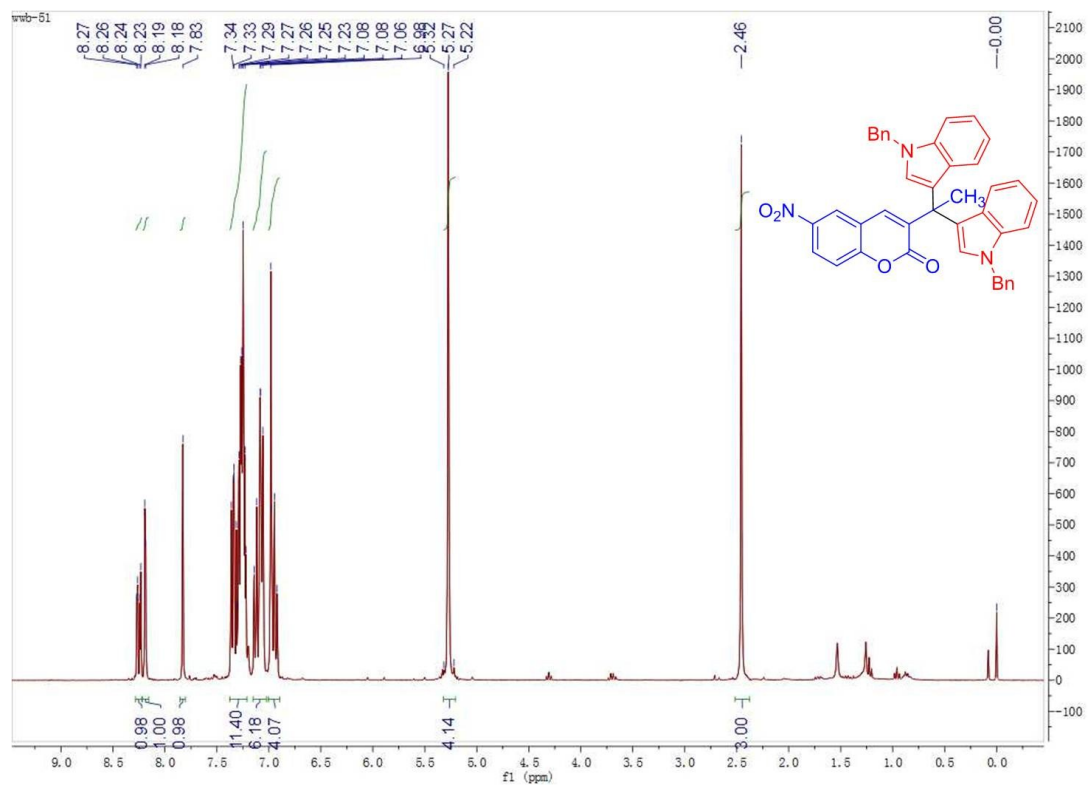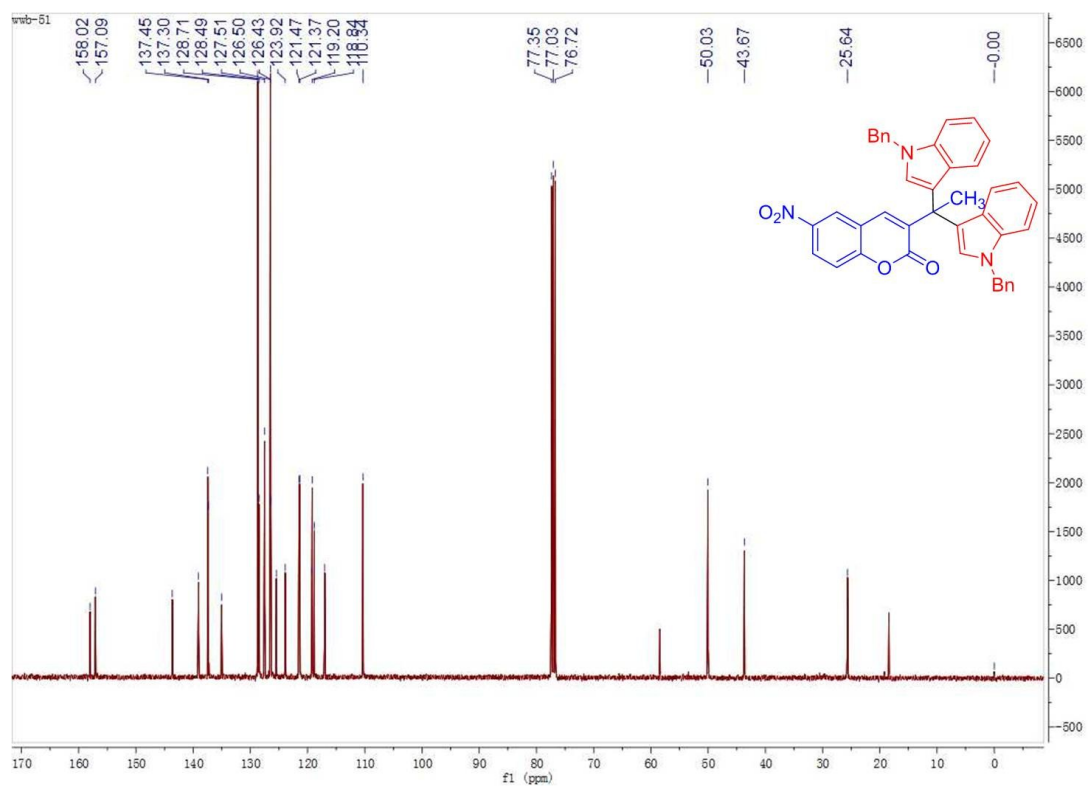

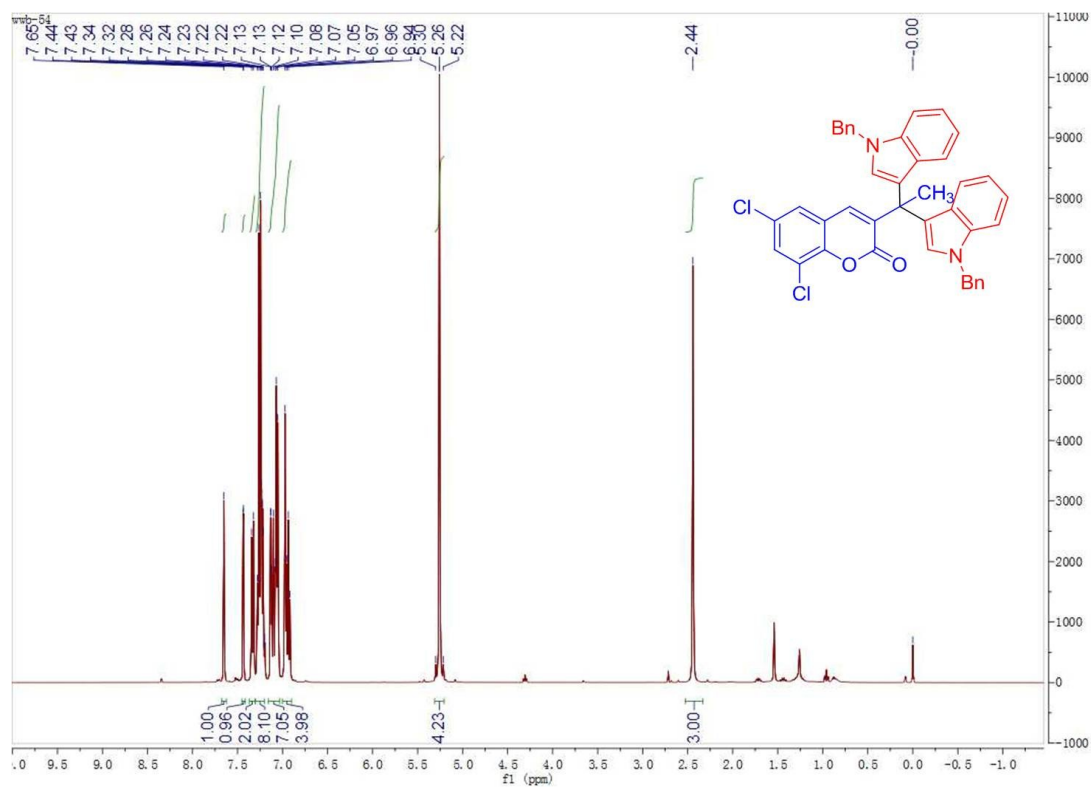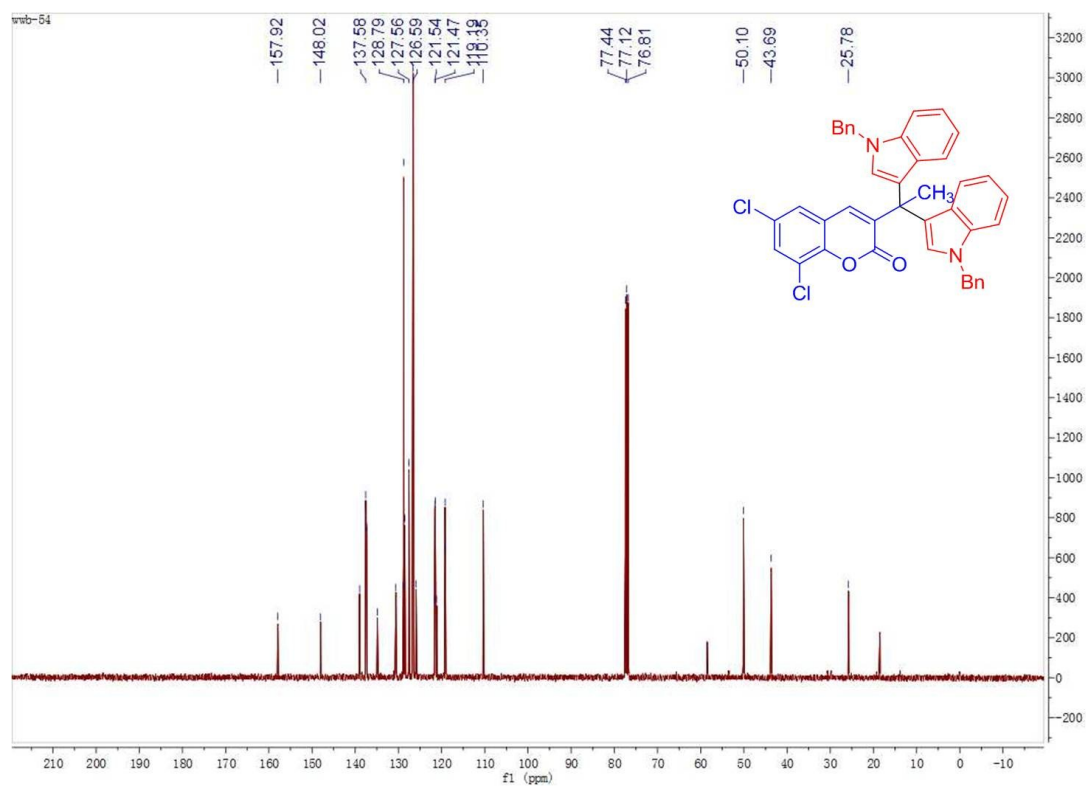

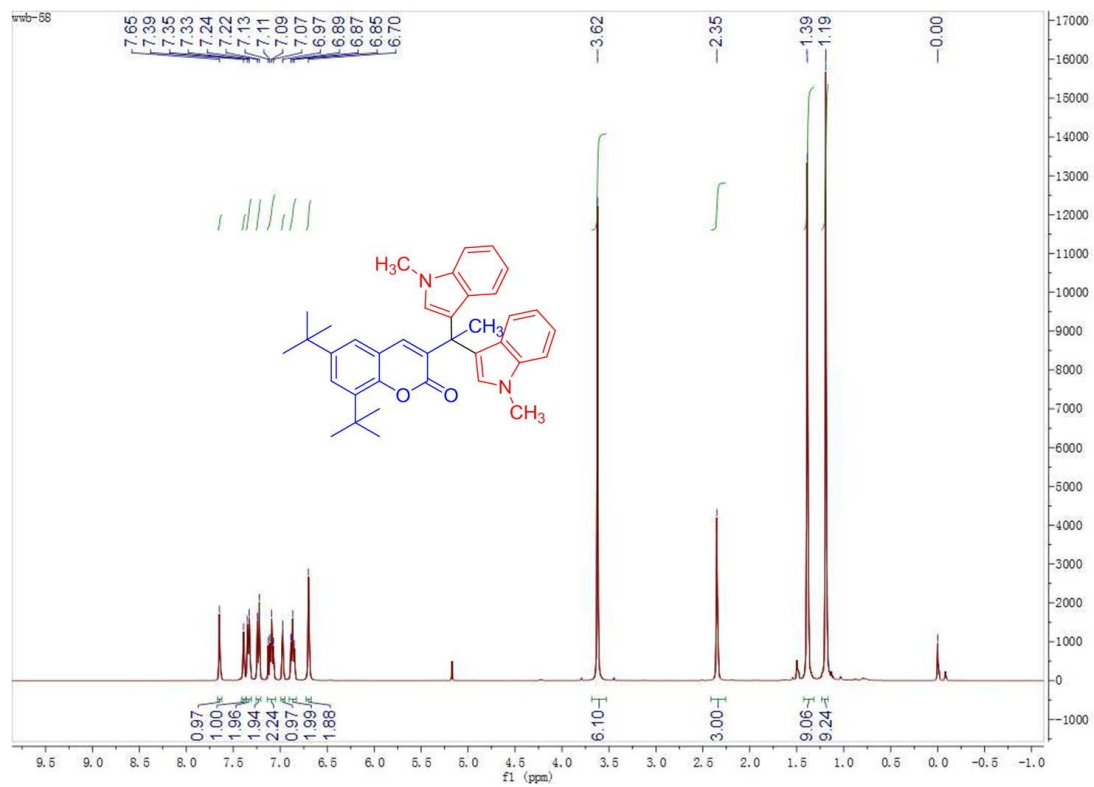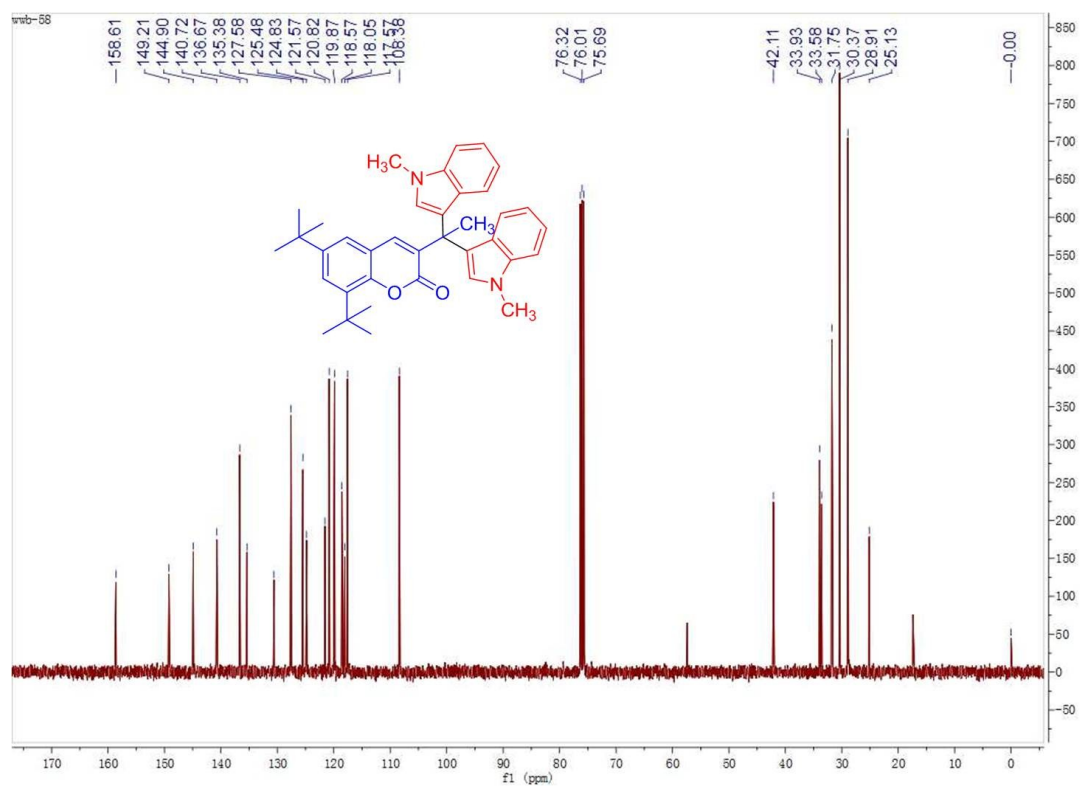

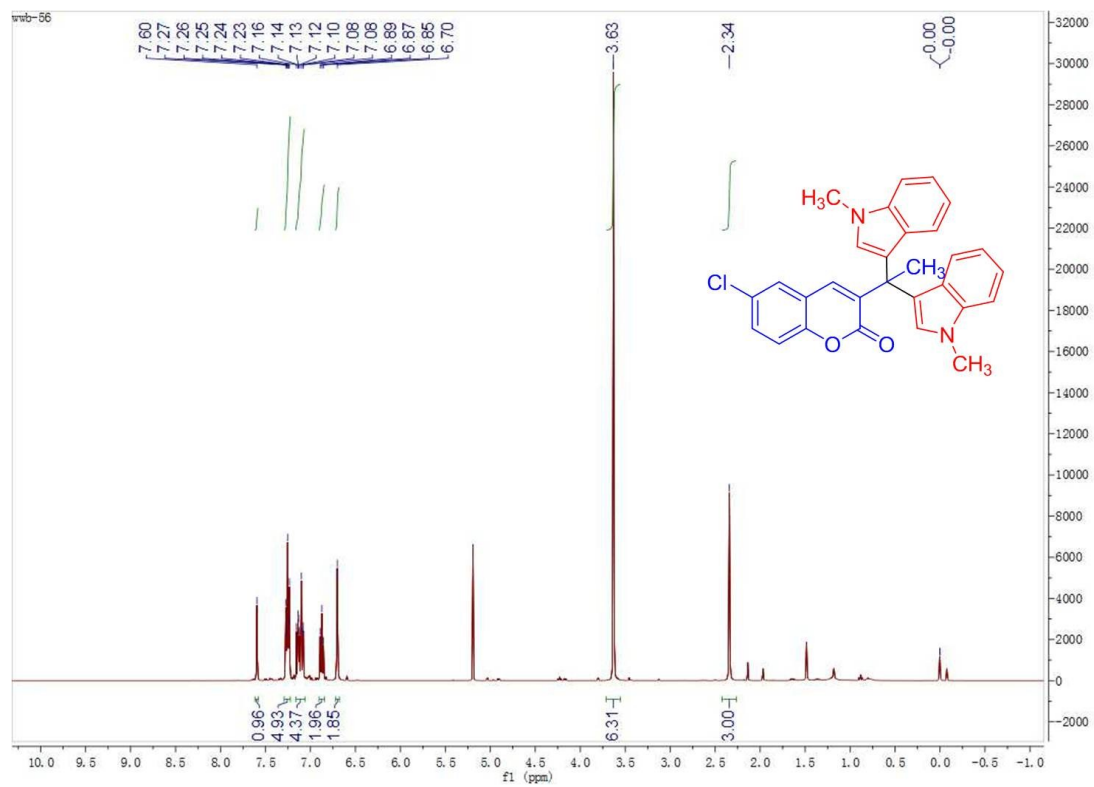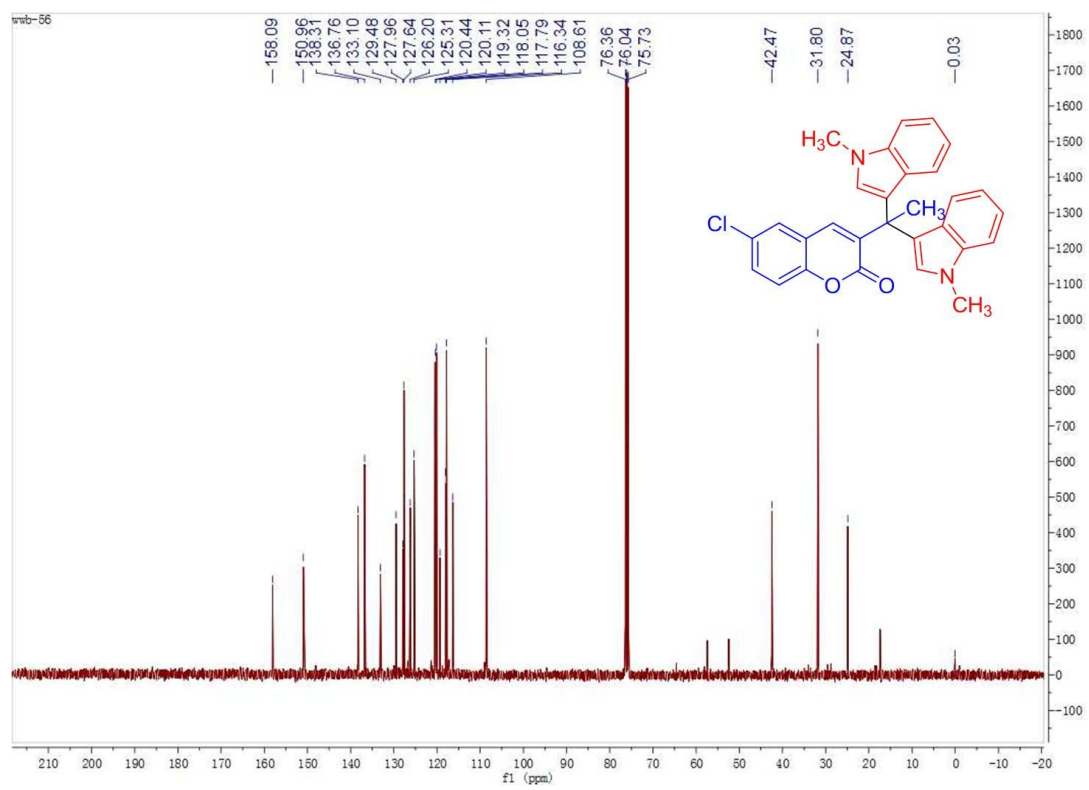

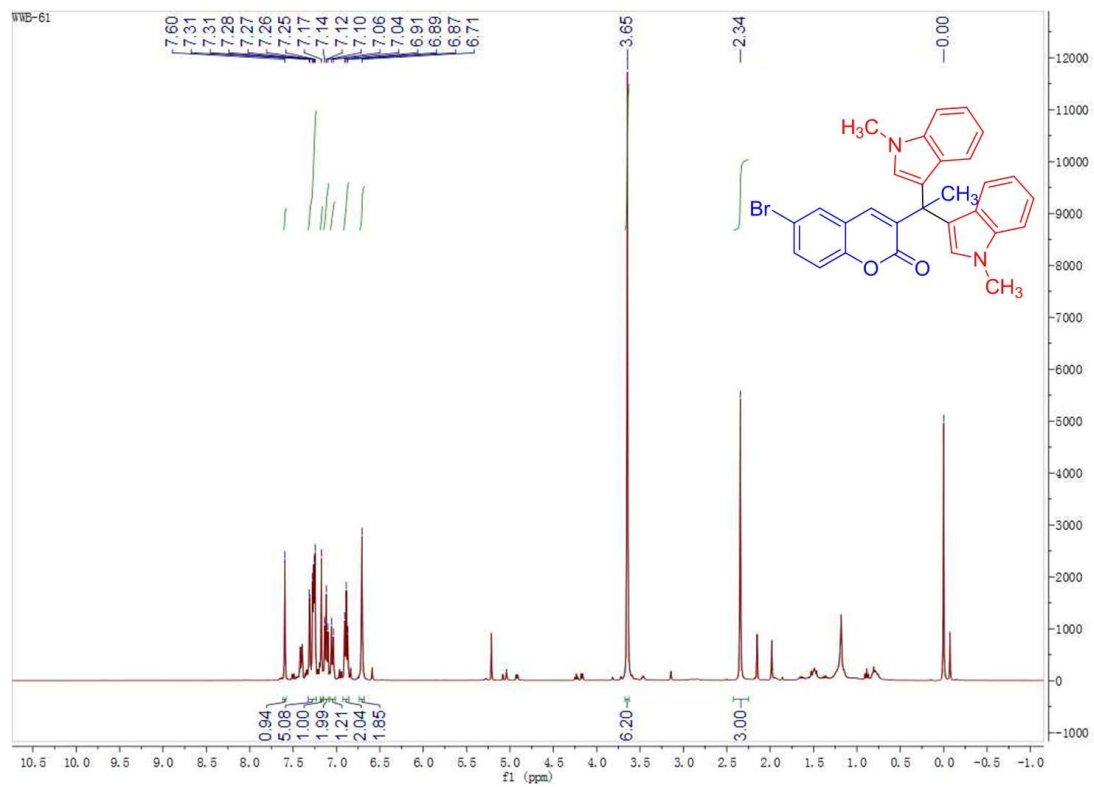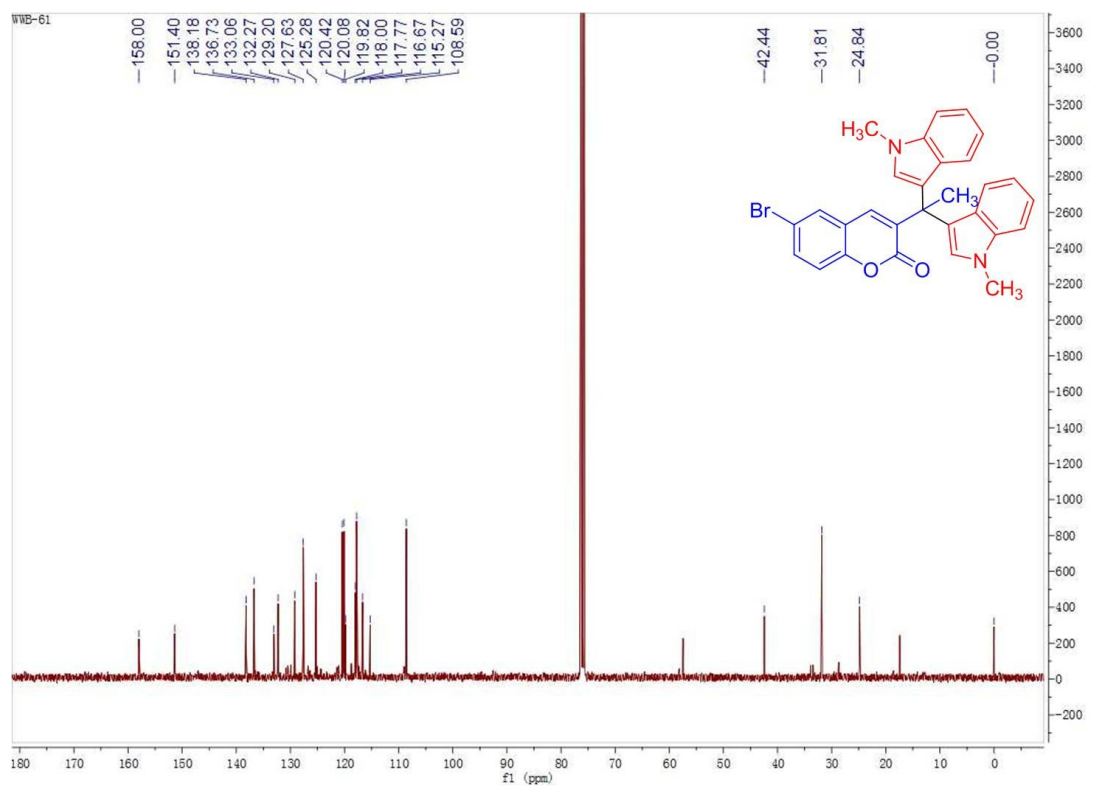

Supplement: c6ob00515b1.pdf [file c6ob00515b1.pdf]
